# Supplementary material for: Study protocol: building an evidence base for epidemiology emergency response, a mixed-methods study
Source: PubMed Central journal article supplement — BMJ Open. 2020 Jun 29;10(6):e037326. doi: 10.1136/bmjopen-2020-037326 (PMC7328751; doi:10.1136/bmjopen-2020-037326), 2020-06-29

# BMJ Open

BMJ Open is committed to open peer review. As part of this commitment we make the peer review history of every article we publish publicly available.

When an article is published we post the peer reviewers' comments and the authors' responses online. We also post the versions of the paper that were used during peer review. These are the versions that the peer review comments apply to.

The versions of the paper that follow are the versions that were submitted during the peer review process. They are not the versions of record or the final published versions. They should not be cited or distributed as the published version of this manuscript.

BMJ Open is an open access journal and the full, final, typeset and author-corrected version of record of the manuscript is available on our site with no access controls, subscription charges or pay-per-view fees (<http://bmjopen.bmj.com>).

If you have any questions on BMJ Open's open peer review process please email [info.bmjopen@bmj.com](mailto:info.bmjopen@bmj.com)

# BMJ Open

## Building an evidence base for epidemiology emergency response, a mixed methods study.

|                               |                                                                                                                                                                                                                                                                                                                                                                                                                                                        |
|-------------------------------|--------------------------------------------------------------------------------------------------------------------------------------------------------------------------------------------------------------------------------------------------------------------------------------------------------------------------------------------------------------------------------------------------------------------------------------------------------|
| Journal:                      | <i>BMJ Open</i>                                                                                                                                                                                                                                                                                                                                                                                                                                        |
| Manuscript ID                 | bmjopen-2020-037326                                                                                                                                                                                                                                                                                                                                                                                                                                    |
| Article Type:                 | Protocol                                                                                                                                                                                                                                                                                                                                                                                                                                               |
| Date Submitted by the Author: | 29-Jan-2020                                                                                                                                                                                                                                                                                                                                                                                                                                            |
| Complete List of Authors:     | Parry, Amy; Australian National University, National Centre for Epidemiology and Population Health<br>Kirk, Martyn; The Australian National University, National Centre for Epidemiology and Population Health<br>Durrheim, David; University of Newcastle<br>Olowokure, Babatunde; World Health Organization, Health Emergencies Programme<br>Housen, Tambri ; Australian National University, National Centre for Epidemiology and Population Health |
| Keywords:                     | EPIDEMIOLOGY, Public health < INFECTIOUS DISEASES, Epidemiology < INFECTIOUS DISEASES                                                                                                                                                                                                                                                                                                                                                                  |
|                               |                                                                                                                                                                                                                                                                                                                                                                                                                                                        |

SCHOLARONE™  
Manuscripts

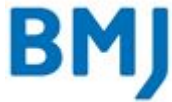

I, the Submitting Author has the right to grant and does grant on behalf of all authors of the Work (as defined in the below author licence), an exclusive licence and/or a non-exclusive licence for contributions from authors who are: i) UK Crown employees; ii) where BMJ has agreed a CC-BY licence shall apply, and/or iii) in accordance with the terms applicable for US Federal Government officers or employees acting as part of their official duties; on a worldwide, perpetual, irrevocable, royalty-free basis to BMJ Publishing Group Ltd ("BMJ") its licensees and where the relevant Journal is co-owned by BMJ to the co-owners of the Journal, to publish the Work in this journal and any other BMJ products and to exploit all rights, as set out in our [licence](#).

The Submitting Author accepts and understands that any supply made under these terms is made by BMJ to the Submitting Author unless you are acting as an employee on behalf of your employer or a postgraduate student of an affiliated institution which is paying any applicable article publishing charge ("APC") for Open Access articles. Where the Submitting Author wishes to make the Work available on an Open Access basis (and intends to pay the relevant APC), the terms of reuse of such Open Access shall be governed by a Creative Commons licence – details of these licences and which [Creative Commons](#) licence will apply to this Work are set out in our licence referred to above.

Other than as permitted in any relevant BMJ Author's Self Archiving Policies, I confirm this Work has not been accepted for publication elsewhere, is not being considered for publication elsewhere and does not duplicate material already published. I confirm all authors consent to publication of this Work and authorise the granting of this licence.

## Manuscript

Study protocol: Building an evidence base for epidemiology emergency response, a mixed methods study.

**Possible authors:** Amy Elizabeth Parry 1, Martyn D Kirk 1, David N Durrheim 2, Babatunde Olowokure 3, Tambri Housen 1

## Author affiliations

1. Australian National University
2. University of Newcastle
3. World Health Organization

## Corresponding author

Amy Elizabeth Parry, [amy.parry@anu.edu.au](mailto:amy.parry@anu.edu.au), [amyparry@gmail.com](mailto:amyparry@gmail.com) +61 2 6125 0681

Building 62, National Centre for Epidemiology & Population Health, Research School of Population Health, The Australian National University, Acton, Australia

## Co-author details

- Dr Tambri Housen: [tambri.housen@anu.edu.au](mailto:tambri.housen@anu.edu.au), Building 62, National Centre for Epidemiology & Population Health, Research School of Population Health, The Australian National University, Acton, Australia
- Professor Martyn D Kirk: [martyn.kirk@anu.edu.au](mailto:martyn.kirk@anu.edu.au), Building 62, National Centre for Epidemiology & Population Health, Research School of Population Health, The Australian National University, Acton, Australia
- Professor David N Durrheim: [David.Durrheim@newcastle.edu.au](mailto:David.Durrheim@newcastle.edu.au), University of Newcastle, Newcastle, New South Wales, Australia
- Dr Babatunde Olowokure: [olowokureb@who.int](mailto:olowokureb@who.int) World Health Organization, Geneva, Switzerland

**Keywords (3-10):** Emergency response, epidemiology, public health workforce, health security, workforce strengthening, community engagement, study protocol

**Ethics approval:** All components of this study have been approved by the Australian National University Human Research Ethics Committee: Ethics IDs 2018-521, 2018-641, 2019-068.

**Acknowledgements:** Thank you to the organisations and individuals who participated in the stakeholder consultation and initial open interviews. The findings from these discussions helped identify the research needs and framed the research questions.

**Abstract word count:** 289

**Manuscript Word count:** 3962

## List of abbreviations:

IHR - International Health Regulations

EPIET - European Programme Intervention Epidemiology Training

FETP - Field Epidemiology Training

- 1
- 2
- 3 FIFO - fly-in-fly-out
- 4 GOARN - Global outbreak alert and response network
- 5 IHR – International Health Regulations
- 6 MAE - Master of Applied Epidemiology
- 7 MSF - Médecins Sans Frontières
- 8 PI - Principal Investigator
- 9
- 10 TEPHINET - Training Programs in Epidemiology and Public Health Interventions Network
- 11 US CDC - United States Centers for Disease Control and Prevention
- 12 WHO - World Health Organization
- 13
- 14
- 15
- 16
- 17
- 18
- 19
- 20
- 21
- 22
- 23
- 24
- 25
- 26
- 27
- 28
- 29
- 30
- 31
- 32
- 33
- 34
- 35
- 36
- 37
- 38
- 39
- 40
- 41
- 42
- 43
- 44
- 45
- 46
- 47
- 48
- 49
- 50
- 51
- 52
- 53
- 54
- 55
- 56
- 57
- 58
- 59
- 60

For peer review only

## Abstract

**Introduction:** Determinants and drivers for emergencies such as political instability, weak health systems, climate change, and forcibly displaced populations, are increasing the severity, complexity and frequency of public health emergencies. As emergencies become more complex, it is increasingly important that the required skillset of the emergency response workforce is clearly defined. To enable essential epidemiological activities to be implemented and managed during an emergency, a workforce is required with the right mix of skills, knowledge, experience, and local context awareness. This study aims to provide local and international responders with an opportunity to actively contribute to the development of new thinking around emergency response roles and required competencies. In this study, we will develop recommendations using a broad range of evidence to address identified lessons and challenges so that future major emergency responses are culturally and contextually appropriate, and less reliant on long-term international deployments.

**Method and analysis:** We will conduct a mixed methods study using an exploratory sequential study design. The integration of four data sources, including key informant interviews, a scoping literature review, survey, and semi-structured interviews will allow the research questions to be examined in a flexible, semi-structured way, from a range of perspectives. The study is unequally weighted, with a qualitative emphasis. We will analyse all activities as individual components, and then together in an integrated analysis. Thematic analysis will be conducted in NVivo11 and quantitative analysis will be conducted in Stata15.

**Ethics and dissemination:** All activities have been approved by the Science and Medical Delegated Ethics Review Committee at the Australian National University (protocol numbers 2018-521, 2018-641, 2019-068). Findings will be disseminated through international and local deployment partners, peer reviewed publication, presentation at international conferences and through social media such as Twitter and Facebook.

## ARTICLE SUMMARY

### Strengths and limitations of this study

1. This study is addressing a critical knowledge gap. The evidence in this area remains weak with few scientific studies; preliminary stakeholder consultation supported the need for more evidence to inform best practice.
2. This study will build evidence to guide deployment and collaboration of the local and international epidemiology workforce that will enhance the effectiveness of the epidemiology response during future emergencies. The iterative approach will support the research to explore both convergent and divergent findings in greater depth.
3. We expect a diversity of respondents with a range of perspectives which will improve our ability to understand lived realities and experiences in a multidimensional way.
4. Qualitative interviews with international responders will be limited to English. Translation will be offered if English is not interviewee's native language. While we anticipate the sample will be multinational, we acknowledge this as a limitation.

### Box 1: Terms used in this study

Epidemiological role: a person who participates in surveillance, response, and disease investigation and control activities during an emergency.

Epidemiology responder: a person working in an epidemiological role during an emergency response, they may or may not be a citizen of the country they are responding within.

## INTRODUCTION

Emergencies do not discriminate; they can happen at any time, in any country. Whether they are a natural hazard such as a flood or cyclone, an infectious disease outbreak, or domestic or regional instability, any serious disruption of community functioning may lead to a situation where the ability of the affected community to manage using its own resources is exceeded.(1) The International

1  
2  
3 Health Regulations (IHR) are a legal instrument that defines the rights and obligations of countries  
4 regarding infectious disease surveillance, alert, and response.(2) Countries signatory to the IHR,  
5  
6 regularly evaluate their capacity as outlined in the IHR;(2) IHR evaluations have identified that few  
7  
8 countries have met the minimum standard.(3,4) One core IHR capacity is related to workforce, the  
9  
10 routine evaluations have identified that there is still much work to be done to achieve resilient  
11  
12 health systems with a strong local workforce capable of responding to public health emergencies.(5)  
13  
14  
15

16  
17 Emergency response requires collaboration between many professions; epidemiologists are  
18  
19 generally recognised as a core contributor. The primary role of the epidemiology emergency  
20  
21 response workforce is to ensure the health and safety of the affected population through the  
22  
23 minimization of mortality and morbidity.(6,7) This is achieved through a number of activities  
24  
25 including establishing, monitoring and/or early warning surveillance systems, using multiple sources  
26  
27 of data and information to conduct risk assessments, rapidly, efficiently and effectively initiating  
28  
29 investigation and control activities, and providing information for decision-making.(6–8)  
30  
31  
32

33  
34 This study will seek to define the epidemiological roles and required competencies of both the  
35  
36 international and local epidemiology workforce during emergency response.  
37  
38

### 39 **Study rationale**

40  
41 Internationally, the determinants and drivers for emergencies such as political instability,(8) weak  
42  
43 health systems, (5,9) climate change, (10,11) and forcibly displaced populations,(12) are increasing in  
44  
45 severity and frequency.(4) Emergencies are becoming protracted and more complex;(4,8,13–16) this  
46  
47 has implications for emergency response management and the required emergency response  
48  
49 workforce. To enable essential epidemiological activities to be implemented and effectively  
50  
51 managed during an emergency, a workforce is required with the right mix of skills, knowledge,  
52  
53 experience, and local context awareness.  
54  
55  
56  
57  
58  
59  
60



1  
2  
3 When emergencies exceed local workforce capacity, support may be required in the form of the  
4 international emergency response workforce.(3) Gostin and Friedman in their 2015 review of the  
5 West African Ebola response identified that there was a need to refine who is deployed and to  
6 certify the competencies of the public health emergency response workforce.(9) Although the  
7 international workforce are used to fill technical needs, many factors affect their usefulness.

8 Responders without the necessary leadership, technical, cultural, or communication skills can limit  
9 the effectiveness of the response, drain limited resources, and potentially cause harm.(17,18) The  
10 short-term fly-in fly-out (FIFO) nature of international emergency responders means high and rapid  
11 staff turnover, which can lead to issues with continuity of response,(19) institutional knowledge  
12 loss,(19) and inconsistent support for local responders.

13  
14 Examining the international epidemiology workforce role is only one part of the picture. Local  
15 epidemiology workforce knowledge and context understanding is essential to ensuring the  
16 effectiveness of emergency response.(20,21) Previous healthcare professional research has  
17 identified the lack of engagement and training of local responders during emergency response as  
18 problematic.(17) Supporting the local workforce throughout an emergency can contribute towards  
19 local workforce upskilling, continuity of essential work, and reduce the impact of international  
20 staffing rotations.(19) Vignettes found in the literature support the value of capacity building of the  
21 local workforce during an emergency,(20,22–26) however the evidence for best practice remains  
22 weak due to few scientific studies particularly focused on this area.

23  
24 Checchi et al highlighted the absence of formal professional certification for professionals during  
25 emergencies.(27) Work has been started for certification of medical personnel during emergencies,  
26 (27,28) however, this has not yet been initiated for other public health professions. Emergency  
27 response organisations, such as the World Health Organization (WHO) and Médecins Sans Frontières  
28 (MSF), aspire to similar values of technical excellence and professionalism.(29–31) This study will  
29 build evidence on what technical excellence and professionalism looks like for the epidemiology  
30

1  
2  
3 workforce during emergencies. Clarity on roles and competencies required during international  
4  
5 emergency response will support adequate preparation prior to deployment of international  
6  
7 responders.(17,18) New thinking is needed to identify how local and international responder  
8  
9 collaboration and upskilling can strengthen the effectiveness of an emergency response.  
10  
11  
12 Development of this knowledge will increase the cultural and contextually appropriate nature of  
13  
14 response as well as facilitate less long-term reliance on the international workforce.(20)  
15  
16

### 17 **Study questions**

18  
19  
20 We conducted a stakeholder consultation in 2018 with five international emergency response and  
21  
22 global health agencies. This consultation aimed to identify needs in emergency response research  
23  
24 and needs according to these emergency response agencies. The findings of this consultation,  
25  
26 combined with the reviewed literature, framed the development of our research questions.  
27  
28

29  
30 We aim to answer three questions:

- 31  
32
- 33 • What is the role of the epidemiology workforce during emergencies in low or limited resource  
34 settings?  
35
  - 36 • What are the capacity needs of the local and international epidemiology workforce during an  
37 emergency response in low resource settings?  
38
  - 39 • How can the emergency epidemiology workforce model be strengthened to transfer skills and  
40 knowledge among local and international responders?  
41  
42  
43  
44  
45

### 46 **Goal and objectives**

47  
48  
49 This study will seek to define the epidemiological roles and required competencies of both the  
50  
51 international and local epidemiology workforce during emergency response. This study is the first  
52  
53 step in ensuring a more effective epidemiological response during future emergencies. Specifically,  
54  
55 the objectives of this study are to:  
56  
57  
58  
59  
60

- 1
- 2
- 3 • Describe existing models of deployment for epidemiologists in international emergency
- 4 response, focusing on strengths and challenges.
- 5
- 6
- 7
- 8 • Identify the capacity needs of the epidemiology workforce in surveillance and response during
- 9 an emergency.
- 10
- 11
- 12 • Provide evidence towards:
- 13
  - 14 ○ Creating a guide for the transfer of epidemiological knowledge and skills during
  - 15 emergency response.
  - 16
  - 17 ○ Developing a framework for local and international epidemiology roles during
  - 18 emergencies.
  - 19
  - 20
  - 21
  - 22
  - 23
  - 24
  - 25

## 26 **METHOD and ANALYSIS**

27  
28 This mixed methods study uses an exploratory sequential study design, integrating qualitative and  
29 quantitative data sources from a scoping literature review, key informant interviews, an emergency  
30 responder survey, and semi-structured interviews.  
31  
32

### 33 **Patient and public involvement**

34  
35 To develop the research questions we conducted a stakeholder consultation with international  
36 emergency response and global health agencies. Stakeholders will continue to support the study and  
37 results will be disseminated with and through them. No patients will be involved in this study.  
38  
39

### 40 **Study population**

41  
42 The target population for key informant interviews are representatives from organisations that have  
43 a major emergency response deployment component, and the epidemiology workforce working  
44 through those organisations (both local and international). Organisations include WHO, the Global  
45 Outbreak Alert and Response Network (GOARN), MSF, and United States Centers for Disease Control  
46 and Prevention (US CDC).  
47  
48  
49  
50  
51  
52  
53  
54  
55  
56  
57  
58  
59  
60

1  
2  
3 The emergency responder survey and semi-structured interviews study population are the  
4 epidemiology emergency response workforce. We will specifically target Field Epidemiology Training  
5 Programme (FETP) officers and graduates, accessed through international epidemiology training  
6 networks such as TEPHINET (Training Programs in Epidemiology and Public Health Interventions  
7 Network).

### 14 15 **Study design**

16  
17 We will conduct an exploratory sequential mixed methods study to build a comprehensive picture of  
18 the epidemiology workforce roles and required skills during emergency response. Mixed methods is  
19 the collection and integration of both quantitative and qualitative approaches to develop a more  
20 complete understanding of the research area.(32,33) This study will take advantage of the strengths  
21 and utility of each method based on the question being answered and the data to be collected.(33)  
22 The study is unequally weighted, with a qualitative emphasis.(32) Quantitative and qualitative  
23 components will be conducted sequentially.(32)

24  
25 Consistent with the mixed methods approach, the integration and analysis of data from each activity  
26 will further inform the development of subsequent activities.(34) An iterative approach will ensure  
27 the design and direction of subsequent activities is appropriate according to the knowledge gained.

28  
29 We will take a pragmatic interpretivist approach.(33,35,36) Understanding the information obtained  
30 will be a process of interpretation viewed through the researchers cultural and experience lens, and  
31 then explored with local and international stakeholders to further understand the meaning and  
32 potential application of the findings.(36) We acknowledge that the findings will be time and context  
33 bound and framed by the life experiences of the participants as well as that of the researchers.(36)

### 34 35 **Study components**

36  
37 The study model in Figure 1 outlines the main study components and how they inform each other.  
38  
39  
40  
41  
42  
43  
44  
45  
46  
47  
48  
49  
50  
51  
52  
53  
54  
55  
56  
57  
58  
59  
60

1  
2  
3 An overview of the current epidemiological emergency response workforce will be conducted  
4  
5 through a scoping literature review. The integration of themes identified in the literature review and  
6  
7 the initial stakeholder consultation will support development of a semi-structured interview guide  
8  
9 for key informant interviews.  
10

11  
12 Findings from key informant interviews will inform the development of items for an online survey  
13  
14 that will be disseminated via social media as well as distributed to officers and graduates of field  
15  
16 epidemiology training programs, globally. Survey participants will be asked to participate in a semi-  
17  
18 structured interview where convergent and divergent perspectives emerging from the survey will be  
19  
20 further explored.  
21  
22

23  
24 These activities will then inform the collection of evidence from epidemiology responders on the  
25  
26 knowledge and skills required as first responders to a public health emergency. The study of  
27  
28 epidemiology responders will consist of two activities; an online self-administered survey, and semi-  
29  
30 structured interviews. The semi-structured interviews will provide an opportunity for further  
31  
32 exploration of topics covered in the survey and examine the lived experience of the epidemiology  
33  
34 workforce during an emergency.  
35  
36

37  
38 Findings from the literature, key informant interviews, epidemiology responder survey, and semi-  
39  
40 structured interviews will be integrated and shared back with stakeholders to support  
41  
42 interpretation. These findings will form the basis for two key outputs; the emergency response  
43  
44 epidemiology workforce framework and emergency response epidemiology workforce training  
45  
46 guides. These tools will be developed in collaboration with stakeholders and then field tested.  
47  
48  
49

### 50 **Sampling**

51  
52 Early consultations with emergency response organisations identified the absence of accurate  
53  
54 emergency response workforce databases. This means that it will not be possible to conduct  
55  
56 representative sampling. Therefore, purposive sampling will be used to identify participants for the  
57  
58  
59  
60

1  
2  
3 various components in this study as the required participants will be contributing specific roles  
4  
5 during emergencies.(37,38)  
6

### 7 8 *Key informant interviews* 9

10  
11 Key informant interviews will be people from organisations who have an epidemiology workforce  
12  
13 active during public health emergencies. These organisations include WHO, MSF, GOARN, USCDC.  
14  
15 Organisations will be asked to identify a short list of interviewees who fulfil the following criteria:  
16  
17 epidemiology emergency response experience, and/or supervised epidemiologists during emergency  
18  
19 response, and/or supported the deployment of epidemiologists, can communicate in English, and  
20  
21 available for interview. These interviewees will then be asked to identify other people to interview  
22  
23 (snowballing). To minimise clustering of networks, we will only select two candidates for interview  
24  
25 per interviewee from the names listed during snowballing. We aim to interview at least 10 people  
26  
27 and ensure there is a range of perspectives from different organisations by using minimum  
28  
29 organisational quotas; WHO (n=4), GOARN (n=2), MSF (n=2), US CDC (n=2).  
30  
31  
32  
33

### 34 *Epidemiology Responder Survey* 35

36  
37 Purposive sampling and snowballing will also be used for the epidemiology responder survey.  
38  
39 Epidemiology responders will be invited to participate in the survey via field epidemiology networks  
40  
41 including TEPHINET, the Australian Master of Applied Epidemiology (MAE) Alumni, European  
42  
43 Programme for Intervention Epidemiology Training (EPIET) Alumni, and the United States Epidemic  
44  
45 Intelligence Service (EIS) Alumni. A social media campaign will be run to recruit epidemiology  
46  
47 emergency responders who are outside of these networks (Twitter, LinkedIn, and Facebook).  
48  
49  
50  
51 Sample size estimates will be calculated based on the TEPHINET alumni database (TEPHIconnect).  
52  
53 TEPHIconnect have a population of 1700 active members; with a confidence level of 95% and  
54  
55 confidence interval of 7, we hope to recruit at least 176 survey respondents. This sample size is  
56  
57  
58  
59  
60

1  
2  
3 supported by previous unpublished survey response rates through TEPHIconnect (9.8%), MAE  
4  
5 Alumni (49%), and EPIET (52%).  
6  
7

### 8 *Semi-structured interviews*

9  
10  
11 In the case of many survey participants self-selecting for interview, maximum variation sampling will  
12  
13 be used. Selection of participants based on region, organisation, and/or event responded to, will  
14  
15 ensure we have a cross-section of perspectives.(39) Interviews will continue until saturation is  
16  
17 reached,(40,41) no more interviewees are identified, or the project period ends.  
18  
19

## 20 **Data collection**

### 21 *Scoping literature review*

22  
23  
24 Multiple bibliographic databases will be used to identify literature. Public health databases searched  
25  
26 will be Scopus, PubMed, Web of Science, Embase, CINHAL, International Bibliography of the Social  
27  
28 Sciences (IBSS) and the World Health Organisation library database (WHO LIS).  
29  
30

31  
32  
33 We will search 10 years of articles published in English; January 2009 to December 2018. A limited  
34  
35 snowballing exercise will then be done, reference lists of all included studies will be searched. The  
36  
37 same search strategy will be used in all databases. Date, time, and result number of each database  
38  
39 search will be tracked in a Microsoft Excel spreadsheet.  
40  
41

42  
43 Search terms will include, health personnel, health worker, epidemiologist, humanitarian, Public  
44  
45 Health Professional, healthcare professional, health workforce, emergency, emergencies, disaster,  
46  
47 relief work, disease outbreaks, hazard, relief operations, refugee, role, job, position, task.  
48  
49

### 50 *Key Informant Interviews*

51  
52  
53 Using an interview guide, the key informant interviews will be semi-structured and carried out by  
54  
55 the same interviewer. Interviews will be conducted via telephone or internet communications.  
56  
57

58 Questions aim to collect practical details on epidemiology deployment, common challenges  
59  
60 experienced, as well as the interviewee's opinion on roles and required skills for field work,

1  
2  
3 performance management in the field, and workforce upskilling during emergency response.

4  
5 Questions will be informed by issues identified in the literature and stakeholder consultation. During  
6  
7 the interview period, the questions will be reviewed in an iterative style to ensure flow of questions,  
8  
9 to obtain clear answers.(42) Interviews will be recorded (with consent) and transcribed.

#### 12 13 *Epidemiology responder survey*

14  
15 The survey of epidemiology responders will be self-administered online via REDCap. The survey will  
16  
17 be guided by the themes raised in the literature and during the key informant interviews. Questions  
18  
19 will be reviewed by key informant interviewees, and field tested with epidemiologists who have  
20  
21 emergency response experience. Open and closed ended questions will be used,(43) and will cover  
22  
23 topics such as the number of previous emergency response deployments, technical support in the  
24  
25 field, type of response, response context, cultural competency, role expectations compared to  
26  
27 reality, and previous training and experience. Participants will be requested to complete the survey  
28  
29 once only and it will be available in French and English.  
30  
31  
32

#### 33 34 *Epidemiology responder semi-structured interviews*

35  
36 An interview guide will be used for each semi-structured interview. The semi-structured format will  
37  
38 give interviewees scope to discuss what is important to them and the events they responded to.  
39  
40 Interviews will be conducted in English, interviewees can request translation support if needed. The  
41  
42 interview will delve deeper into the interviewee's experience during the emergency response.  
43  
44 Interview questions will be informed by common themes identified in the survey and key informant  
45  
46 interviews. Divergent survey findings will be further explored during the interviews. It is expected  
47  
48 that interview questions may cover topics such as working with international and local  
49  
50 epidemiologists, what their role was and how this connected with other components of the  
51  
52 response, whether they participated in or conducted activities to upskill colleagues, and the  
53  
54 perceived impact this had. They will be asked to discuss the challenges faced during the response  
55  
56 and what they did to address them.  
57  
58  
59  
60



## Data analysis

Sequential and concurrent analysis will be conducted;(32) data from each activity will be used to inform the next activity. We will analyse all activities as individual components, and then together in a mixed analysis.(34)

The literature review will be analysed thematically. Common themes and ideas identified will inform the development of key informant interviews. Key informant interviews will be analysed to support development of themes for the epidemiology responder survey, and then all previous findings will inform the question development for the semi-structured interviews.

Key informant interview and semi-structured interview data will be coded then analysed through thematic analysis, using NVivo 11. Thematic analysis will be an iterative process, with concepts and themes developed and combined as the findings are analysed and relationships are identified.(40,44,45) We define a theme as a pattern identified within the data.(44,46) These themes can be implicit or explicit. Analysis will be data-driven, inductive coding will be conducted initially to identify relationships within the data without using a pre-existing frame.(40,44) A thematic codebook outlining inclusion and exclusion criteria will be developed to ensure validity, consistency, and repeatability of coding. Interviews will be coded in two ways. Firstly, interviews will be coded based on the explicitly stated words and ideas (semantic), then interviews will be coded for underlying ideas and assumptions (latent).(44) All codes will be further reviewed, cleaned, analysed, summarised, and interpreted for meaning.(44)

Survey data will be analysed descriptively in STATA 15. Data will be further analysed to determine associations within and between respondents. Data will be examined for trends within and between international and local responders, comparison of trends between emergency response event types, and skill level and experience of responders.

### Data interpretation

The data from these activities will be integrated and patterns, themes, and relationships formed and examined. The iterative approach will ensure that converging and diverging themes will be further explored in proceeding activities and support answering the research questions or development of further studies. We expect that mixing of the data will complement and extend the knowledge obtained.(47) Triangulation of this data will contribute evidence towards development of the workforce framework and identify training needs of local and international responders.(47)

Preliminary findings will be shared back with stakeholders, including key informant interviewees and study participants, to provide an opportunity to comment and provide further feedback.

### DISCUSSION

Discourse around development and aid, including emergency response, identify that good intentions can cause unintentional harm.(48) Heymann et al identified the 'parachuting' in of international responders as a key ethical issue occurring during public health emergencies,(49) as is the lack of engaging and upskilling of local responders. In this study, response approaches will be studied to increase meaningful participation and engagement of local responders to ensure a contextually appropriate response.(20)

Maintaining a 'country focus' is one of WHO's guiding principles.(50) This study aims to ensure that local responders are an active part of defining the roles and required competencies of the epidemiology emergency response workforce. Both the local and international workforce included in the study will contribute towards developing new thinking about emergency response and ensuring the strengths of all responders are taken advantage of, as well as developing recommendations to ensure a legacy of an upskilled local workforce post-response. Capacity building, partnerships, active local participation, mentoring and coaching, and collaboration during emergency response are themes that will be explored.

1  
2  
3 The mixed methods iterative approach we will use in this study will support us to examine this topic  
4 in a flexible, semi-structured way, from a range of perspectives.(51) Emergency response is a  
5 complex area, in which a multitude of players are conducting a huge amount of work concurrently,  
6 under great pressure. Considering this complexity through a variety of lenses will improve our ability  
7 to understand the lived realities and experiences of epidemiology responders, in a multidimensional  
8 way.(51,52) The combination of survey data and semi-structured interviews will support the  
9 development of recommendations that use a broad range of evidence to address the current  
10 challenges.  
11  
12  
13  
14  
15  
16  
17  
18  
19

### 20 21 **Ethics**

22  
23 All activities have been approved by the Science and Medical Delegated Ethics Review Committee at  
24 the Australian National University, protocol numbers 2018/521, 2018/641, 2019/068.  
25  
26  
27

### 28 29 **Consent**

30  
31 Participation in this study will be voluntary; individual written (or online) consent will be sought from  
32 all participants. Each participant will receive a study information sheet that outlines the project and  
33 expectations in plain language.  
34  
35  
36  
37

### 38 39 **Expected output**

40  
41 A key output of this research will be the development of evidence-based epidemiological emergency  
42 workforce recommendations to increase the effectiveness of epidemiologists during emergencies.  
43  
44

45  
46 The research will contribute towards creating an epidemiology emergency workforce framework,  
47 which will underpin the role of the epidemiology workforce in a range of emergency types, as well as  
48 outline the required responder competencies.  
49  
50  
51

52  
53 The identification of unmet needs in the current epidemiology training, will support training  
54 programmes to address the identified needs and improve the application of skills during a response.  
55  
56  
57  
58  
59  
60

1  
2  
3 We will also identify, develop, and collate a range of evidence-based resources that can support  
4 appropriate upskilling during a response from entry level epidemiology onwards, for both local and  
5 international responders.  
6  
7  
8  
9

## 10 **Dissemination**

11  
12  
13 Through engaging both international and local emergency response partners throughout this study,  
14 we hope to ensure this research remains useful and relevant to potential end users.  
15

16  
17 All participants will be provided with a weblink to keep updated with study progress and outputs  
18 through the research. Results will also be disseminated through social media such as Twitter,  
19 LinkedIn, and Facebook. It is expected that manuscripts for publication as well as conference  
20 presentations will be developed to disseminate the results of this study. Manuscripts will be  
21 published in open access journals and findings will be further disseminated with and through  
22 participating emergency response organisations.  
23  
24  
25  
26  
27  
28  
29  
30  
31

## 32 **Limitations**

33  
34 As with all studies, this study has inherent limitations that we have attempted to mitigate. During  
35 this research we aim to minimise the impact that bias may have on the results we obtain. Interviews  
36 conducted in this research aim to understand processes and experiences, not to analyse how  
37 distributed these experiences are.(40) As a limited number of people have the knowledge and  
38 experience required to participate in the key informant interviews, purposive sampling may  
39 introduce bias. Organisational shortlisting of possible candidates could lead to selection of  
40 candidates who may have organisationally approved views on emergency response. Snowballing can  
41 also introduce bias as these interviewees are from the same network and therefore may hold similar  
42 opinions.(53) Pre-set selection criteria of possible participants and our multi-step sampling method  
43 aims to minimise these biases. As noted above, we aim to minimise clustering of common networks  
44 during snowballing through selection and invitation of a maximum of two candidates per  
45 interviewee.  
46  
47  
48  
49  
50  
51  
52  
53  
54  
55  
56  
57  
58  
59  
60

1  
2  
3 Another possible limitation to this study is obtaining an accurate denominator for the target  
4  
5 populations. The numbers and scale of emergencies change from year-to-year, and the workforce  
6  
7 shifts according to need, as well as other factors such as organisational funding. We will attempt to  
8  
9 mitigate this by working with local and international participating agencies and networks to  
10  
11 ascertain epidemiology workforce estimations for the study period.  
12  
13

14  
15 As the timing of the survey and interview is not during or immediately after an emergency response,  
16  
17 recall bias may affect the information obtained. This timing may have added advantages as people  
18  
19 have time to be reflective of what went well and what could be improved.(54,55)  
20  
21

22  
23 There is a risk of selection bias during the epidemiology emergency responder survey as it is a self-  
24  
25 administered online survey. To attempt to lessen the impact of this bias, we will use multiple  
26  
27 pathways to recruit participants and we will collaborate closely with emergency response partners.  
28

29 As the survey will be available in multiple languages, this will increase representation from a variety  
30  
31 of people as well as contexts.  
32  
33

34  
35 There will also be varying timeframes between emergency response and survey completion between  
36  
37 epidemiology responder survey participants. Participants may therefore have different levels of  
38  
39 recall, and people with extremely negative or positive response experiences may remember  
40  
41 differently. Questions on deployment will be broad to lessen the impact that this may have, and  
42  
43 divergent findings will be further explored in the semi-structured interviews.  
44  
45

46  
47 Additionally, the Principal Investigator (PI) for this study has worked in both acute and protracted  
48  
49 emergencies as an epidemiologist. The views of the PI on this topic may introduce bias and influence  
50  
51 the questions asked and the information obtained. The PI acknowledges this possible bias and will  
52  
53 seek perspectives and interpretations on questions and analysis, with local and international  
54  
55 stakeholders.  
56  
57  
58  
59  
60

## CONCLUSION

This study will build evidence to guide epidemiology emergency response and collaboration of the local and international epidemiology workforce that will enhance the effectiveness of the epidemiology response during future emergencies. Development of clearly articulated epidemiological roles during emergency response will enable organisations to better use the skills of the epidemiology workforce. The provision of recommendations to technically support local responders should decrease reliance on the international responder workforce and increase the cultural and contextual appropriateness of the response.

**Author contributions:** AP wrote the manuscript and is leading the study; TH, BO, DD, MK supported study design development and revised the manuscript critically. All authors read and approved the final manuscript.

**Competing interests:** The authors declare that they have no competing interests.

**Funding:** This research received no specific grant from any funding agency in the public, commercial or not-for-profit sectors. AP receives Commonwealth and ANU science merit scholarships, along with funding from the Australian National Health and Medical Research Council (NHMRC) Integrated Systems for Epidemic Response (APP1107393). MDK is supported by an NHMRC fellowship (APP1145997) and receives funding from the NHMRC for Integrated Systems for Epidemic Response. The funders did not have any role in the study design, data collection and analysis, decision to publish or preparation of the manuscript.

**Data sharing statement:** We are sharing this protocol with BMJ open readers to be open with our planned methods and outcomes. We will report future results of this study as de-identified aggregate data. Data analysis plans and data collection tools can be made available.

## REFERENCES

1. WHO | Definitions: emergencies [Internet]. WHO. [cited 2018 May 31]. Available from: <http://www.who.int/hac/about/definitions/en/>
2. WHO | International Health Regulations (2005) [Internet]. WHO. [cited 2018 Apr 16]. Available from: <http://www.who.int/ihr/publications/9789241580496/en/>
3. Gates B. The Next Epidemic — Lessons from Ebola. *N Engl J Med*. 2015 Apr 9;372:1381–4.
4. Global Preparedness Monitoring Board. A world at risk: annual report on global preparedness for health emergencies [Internet]. Geneva: World Health Organization; 2019 [cited 2019 Sep 23]. Available from: [https://apps.who.int/gpmb/assets/annual\\_report/GPMB\\_annualreport\\_2019.pdf](https://apps.who.int/gpmb/assets/annual_report/GPMB_annualreport_2019.pdf)
5. Kruk ME, Myers M, Varpilah ST, et al. What is a resilient health system? Lessons from Ebola. *The Lancet*. 2015 May;385(9980):1910–2.
6. Waring SC, Brown BJ. The Threat of Communicable Diseases Following Natural Disasters: A Public Health Response. *Disaster Manag Response*. 2005 Apr;3(2):41–7.
7. Connolly MA, Gayer M, Ryan MJ, et al. Communicable diseases in complex emergencies: impact and challenges. *The Lancet*. 2004 Nov 27;364(9449):1974–83.
8. Brennan RJ, Nandy R. Complex humanitarian emergencies: A major global health challenge. *Emerg Med*. 2001 Jun 1;13(2):147–56.
9. Gostin LO, Friedman EA. A retrospective and prospective analysis of the west African Ebola virus disease epidemic: robust national health systems at the foundation and an empowered WHO at the apex. *The Lancet*. 2015 May;385(9980):1902–9.
10. Frumkin H, Hess J, Luber G, et al. Climate Change: The Public Health Response. *Am J Public Health*. 2008 Mar;98(3):435–45.
11. UN ESCAP. The Disaster Riskscape Across Asia-Pacific. Pathways for resilience, inclusion and empowerment [Internet]. United Nations publication; 2019 [cited 2019 Sep 23]. Available from: <https://www.unescap.org/publications/asia-pacific-disaster-report-2019>.
12. UNHCR. Global Trends: Forced Displacement in 2018 [Internet]. [cited 2019 Aug 22]. Available from: <https://www.unhcr.org/5d08d7ee7.pdf>
13. Blanchet K, Ramesh A, Frison S, et al. Evidence on public health interventions in humanitarian crises. *The Lancet*. 2017 Nov 18;390(10109):2287–96.
14. Chan JL, Burkle FM. A Framework and Methodology for Navigating Disaster and Global Health in Crisis Literature. *PLoS Curr* [Internet]. 2013 Apr 4 [cited 2018 May 31];5. Available from: <https://www.ncbi.nlm.nih.gov/pmc/articles/PMC3625621/>
15. Spiegel P, Chanis R, Trujillo A. Innovative health financing for refugees. *BMC Med*. 2018 Jun 15;16:90.

16. WHO | WHO's Six-Year Strategic Plan to Minimize the Health Impact of Emergencies and Disasters [Internet]. WHO. [cited 2018 May 18]. Available from: <http://www.who.int/hac/donorinfo/six-year-humanitarian-plan/en/>
17. Hunt MR. Moral experience of Canadian healthcare professionals in humanitarian work. *Prehospital Disaster Med.* 2009 Dec;24(6):518–24.
18. Chiu C-Y, Lonner WJ, Matsumoto D, et al. Cross-Cultural Competence. *J Cross-Cult Psychol.* 2013;44(6):843–8.
19. Hunt MR. Establishing moral bearings: ethics and expatriate health care professionals in humanitarian work. *Disasters.* 35(3):606–22.
20. Yozwiak NL, Happi CT, Grant DS et al. Roots, Not Parachutes: Research Collaborations Combat Outbreaks. *Cell.* 2016 Jun 30;166(1):5–8.
21. Currie J, Grenfell B, Farrar J. Beyond Ebola. *Science.* 2016 Feb 19;351(6275):815–6.
22. Ehiri JE, Gunn JKL, Center KE, et al. Training and deployment of lay refugee/internally displaced persons to provide basic health services in camps: a systematic review. *Glob Health Action* [Internet]. 2014 Oct 1 [cited 2018 May 30];7. Available from: <https://www.ncbi.nlm.nih.gov/pmc/articles/PMC4185139/>
23. Bower H. NZARA Putting the capacity into capacity building in South Sudan. *The Lancet.* 2000 Aug 19;356(9230):661.
24. Buseh AG, Stevens PE, Bromberg M, et al. The Ebola epidemic in West Africa: Challenges, opportunities, and policy priority areas. *Nurs Outlook.* 2015 Jan;63(1):30–40.
25. UNHCR - Rohingya refugee volunteers trained to help others in distress [Internet]. [cited 2018 May 30]. Available from: <http://www.unhcr.org/news/latest/2018/5/5b066a544/rohingya-refugee-volunteers-trained-help-others-distress.html>
26. André AM, Lopez A, Perkins S et al. Frontline Field Epidemiology Training Programs as a Strategy to Improve Disease Surveillance and Response. *Emerg Infect Dis.* 2017 Dec;23(Suppl 1):S166–73.
27. Checchi F, Waldman RJ, Roberts LF, et al. World Health Organization and emergency health: if not now, when?: *BMJ.* 2016 Jan 28;i469.
28. Foreign Medical Team Working Group under the Global Health Cluster, Norton I, Schreeb J von, Aitken P, et al. Classification and minimum standards for foreign medical teams in sudden onset disasters [Internet]. World Health Organization, [cited 2018 Jul 23]. Available from: [http://www.who.int/hac/global\\_health\\_cluster/fmt\\_guidelines\\_september2013.pdf?ua=1](http://www.who.int/hac/global_health_cluster/fmt_guidelines_september2013.pdf?ua=1)
29. World Health Organization. WHO values charter [Internet]. [cited 2019 Jul 15]. Available from: [https://www.who.int/docs/default-source/documents/values-charter-en.pdf?Status=Temp&sfvrsn=4ed75cec\\_12](https://www.who.int/docs/default-source/documents/values-charter-en.pdf?Status=Temp&sfvrsn=4ed75cec_12)
30. United Nations. United National Competencies for the Future [Internet]. [cited 2019 Jul 15]. Available from: [https://careers.un.org/lbw/attachments/competencies\\_booklet\\_en.pdf](https://careers.un.org/lbw/attachments/competencies_booklet_en.pdf)



- 1
- 2
- 3
- 4 31. Médecins Sans Frontières (MSF) International. Who we are [Internet]. Médecins Sans
- 5 Frontières (MSF) International. [cited 2019 Jul 15]. Available from: [https://www.msf.org/who-](https://www.msf.org/who-we-are)
- 6 [we-are](https://www.msf.org/who-we-are)
- 7
- 8 32. John W Creswell, Vicki L Plano Clark. Designing and conducting mixed methods research. Sage
- 9 Publications; 2007.
- 10
- 11 33. Johnson RB, Onwuegbuzie AJ. Mixed Methods Research: A Research Paradigm Whose Time
- 12 Has Come. *Educ Res.* 2004;33(7):14–26.
- 13
- 14 34. Bazeley P. Integrative Analysis Strategies for Mixed Data Sources. *Am Behav Sci.* 2012
- 15 Jun;56(6):814–28.
- 16
- 17 35. Cameron R. Mixed Methods Research: The Five Ps Framework. *Electron J Bus Res Methods.*
- 18 2011;9(2):96–108.
- 19
- 20 36. Carol Grbich. *Qualitative Data Analysis: An Introduction. Second Edition.* The Flinders
- 21 University of South Australia: SAGE Publishing;
- 22
- 23 37. Deborah K. Padgett. *Qualitative and Mixed Methods in Public Health.* SAGE Publications; 2012.
- 24
- 25 38. Teddlie C, Yu F. Mixed Methods Sampling: A Typology With Examples. *J Mix Methods Res.* 2007
- 26 Jan;1(1):77–100.
- 27
- 28 39. Palinkas LA, Horwitz SM, Green CA, et al. Purposeful sampling for qualitative data collection
- 29 and analysis in mixed method implementation research. *Adm Policy Ment Health.* 2015
- 30 Sep;42(5):533–44.
- 31
- 32 40. Liamputtong P. *Qualitative Research Methods [Internet].* South Melbourne, Vic., Oxford
- 33 University Press; 2009 [cited 2018 Jul 25]. Available from:
- 34 <https://trove.nla.gov.au/work/7394612>
- 35
- 36 41. Bowen GA. Naturalistic inquiry and the saturation concept: a research note. *Qual Res.* 2008
- 37 Feb 1;8(1):137–52.
- 38
- 39 42. Guest G, MacQueen KM, Namey EE. Chapter 2 | Planning and Preparing the Analysis. In:
- 40 *Applied Thematic Analysis [Internet].* SAGE Publications; 2012 [cited 2018 Oct 10]. Available
- 41 from: [https://us.sagepub.com/sites/default/files/upm-binaries/44135\\_2.pdf](https://us.sagepub.com/sites/default/files/upm-binaries/44135_2.pdf)
- 42
- 43 43. de Vaus D. *Surveys in Social Research.* 6th edition. Allen & Unwin - Australia; 2014.
- 44
- 45 44. Braun V, Clarke V. Using thematic analysis in psychology. *Qual Res Psychol.* 2006 Jan 1;3(2):77–
- 46 101.
- 47
- 48 45. Bazeley P. Analysing Qualitative Data: More Than ‘Identifying Themes.’ *Malays J Qual Res.*
- 49 2009;2(2):6–22.
- 50
- 51 46. Joffe H. Chapter 15: Thematic Analysis. In: *Qualitative Research Methods in Mental Health and*
- 52 *Psychotherapy: A Guide for Students and Practitioners.* Edied by David Harper and Andrew
- 53 Thompson. Chichester; 2012. p. 209–23.
- 54
- 55 47. Bazeley P. Teaching Mixed Methods. *Qual Res J.* 2003;3 (special issue):117–26.
- 56
- 57
- 58
- 59
- 60

- 1  
2  
3  
4  
5  
6  
7  
8  
9  
10  
11  
12  
13  
14  
15  
16  
17  
18  
19  
20  
21  
22  
23  
24  
25  
26  
27  
28  
29  
30  
31  
32  
33  
34  
35  
36  
37  
38  
39  
40  
41  
42  
43  
44  
45  
46  
47  
48  
49  
50  
51  
52  
53  
54  
55  
56  
57  
58  
59  
60
48. Hunt MR, Schwartz L, Sinding C, et al. The Ethics of Engaged Presence: A Framework for Health Professionals in Humanitarian Assistance and Development Work. *Dev World Bioeth*. 2014 Apr 1;14(1):47–55.
  49. Heymann DL, Liu J, Lillywhite L. Partnerships, Not Parachutists, for Zika Research. *N Engl J Med*. 2016 Apr 21;374(16):1504–5.
  50. World Health Organization. Emergency Response Framework (ERF) 2nd edition [Internet]. Geneva; 2017 [cited 2018 May 18]. Available from: <http://www.who.int/hac/about/erf/en/>
  51. Bazeley P. *Integrating Analyses in Mixed Methods Research*. SAGE Publications; 2012; 2018.
  52. Mason J. Mixing methods in a qualitatively driven way. *Qual Res*. 2006 Feb 1;6(1):9–25.
  53. Onwuegbuzie AJ, Collins KMT. The Role of Sampling in Mixed Methods-Research: Enhancing Inference Quality. *KZfSS Köln Z Für Soziol Sozialpsychologie*. 2017 Oct;69(S2):133–56.
  54. Bernard AW, Gorgas D, Greenberger S, et al. The Use of Reflection in Emergency Medicine Education. *Acad Emerg Med*. 2012;19(8):978–82.
  55. World Health Organization. Guidance for after action review (AAR) [Internet]. Geneva, Switzerland: World Health Organization; 2019 [cited 2019 Oct 8]. Report No.: WHO/WHE/CPI/2019.4. Available from: <https://apps.who.int/iris/bitstream/handle/10665/311537/WHO-WHE-CPI-2019.4-eng.pdf?sequence=1>

Figure 1: Study model for evidence building for emergency response epidemiology workforce

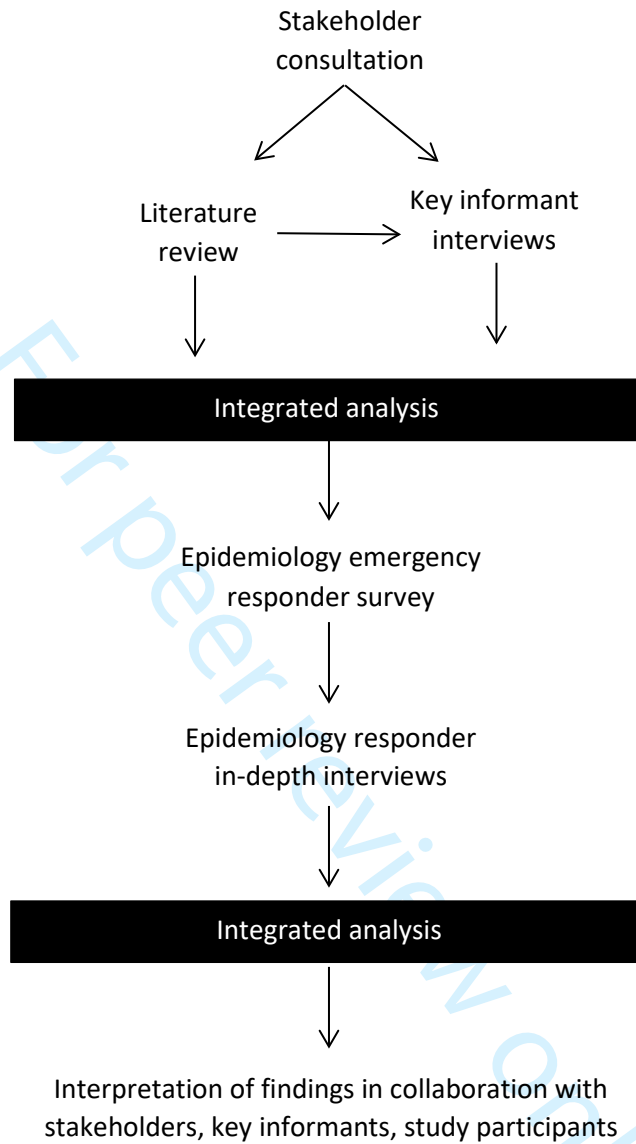

# BMJ Open

## Study Protocol: Building an evidence base for epidemiology emergency response, a mixed methods study

|                                 |                                                                                                                                                                                                                                                                                                                                                                                                                                                        |
|---------------------------------|--------------------------------------------------------------------------------------------------------------------------------------------------------------------------------------------------------------------------------------------------------------------------------------------------------------------------------------------------------------------------------------------------------------------------------------------------------|
| Journal:                        | <i>BMJ Open</i>                                                                                                                                                                                                                                                                                                                                                                                                                                        |
| Manuscript ID                   | bmjopen-2020-037326.R1                                                                                                                                                                                                                                                                                                                                                                                                                                 |
| Article Type:                   | Protocol                                                                                                                                                                                                                                                                                                                                                                                                                                               |
| Date Submitted by the Author:   | 07-May-2020                                                                                                                                                                                                                                                                                                                                                                                                                                            |
| Complete List of Authors:       | Parry, Amy; Australian National University, National Centre for Epidemiology and Population Health<br>Kirk, Martyn; The Australian National University, National Centre for Epidemiology and Population Health<br>Durrheim, David; University of Newcastle<br>Olowokure, Babatunde; World Health Organization, Health Emergencies Programme<br>Housen, Tambri ; Australian National University, National Centre for Epidemiology and Population Health |
| <b>Primary Subject Heading</b>: | Epidemiology                                                                                                                                                                                                                                                                                                                                                                                                                                           |
| Secondary Subject Heading:      | Evidence based practice, Global health, Public health                                                                                                                                                                                                                                                                                                                                                                                                  |
| Keywords:                       | EPIDEMIOLOGY, Public health < INFECTIOUS DISEASES, Epidemiology < INFECTIOUS DISEASES                                                                                                                                                                                                                                                                                                                                                                  |
|                                 |                                                                                                                                                                                                                                                                                                                                                                                                                                                        |

SCHOLARONE™  
Manuscripts

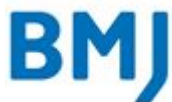

I, the Submitting Author has the right to grant and does grant on behalf of all authors of the Work (as defined in the below author licence), an exclusive licence and/or a non-exclusive licence for contributions from authors who are: i) UK Crown employees; ii) where BMJ has agreed a CC-BY licence shall apply, and/or iii) in accordance with the terms applicable for US Federal Government officers or employees acting as part of their official duties; on a worldwide, perpetual, irrevocable, royalty-free basis to BMJ Publishing Group Ltd ("BMJ") its licensees and where the relevant Journal is co-owned by BMJ to the co-owners of the Journal, to publish the Work in this journal and any other BMJ products and to exploit all rights, as set out in our [licence](#).

The Submitting Author accepts and understands that any supply made under these terms is made by BMJ to the Submitting Author unless you are acting as an employee on behalf of your employer or a postgraduate student of an affiliated institution which is paying any applicable article publishing charge ("APC") for Open Access articles. Where the Submitting Author wishes to make the Work available on an Open Access basis (and intends to pay the relevant APC), the terms of reuse of such Open Access shall be governed by a Creative Commons licence – details of these licences and which [Creative Commons](#) licence will apply to this Work are set out in our licence referred to above.

Other than as permitted in any relevant BMJ Author's Self Archiving Policies, I confirm this Work has not been accepted for publication elsewhere, is not being considered for publication elsewhere and does not duplicate material already published. I confirm all authors consent to publication of this Work and authorise the granting of this licence.

## Manuscript

Study protocol: Building an evidence base for epidemiology emergency response, a mixed methods study.

**Possible authors:** Amy Elizabeth Parry 1, Martyn D Kirk 1, David N Durrheim 2, Babatunde Olowokure 3, Tambri Housen 1

## Author affiliations

1. Australian National University
2. University of Newcastle
3. World Health Organization

## Corresponding author

Amy Elizabeth Parry, [amy.parry@anu.edu.au](mailto:amy.parry@anu.edu.au), [amyparry@gmail.com](mailto:amyparry@gmail.com) +61 2 6125 0681

Building 62, National Centre for Epidemiology & Population Health, Research School of Population Health, The Australian National University, Acton, Australia

## Co-author details

- Dr Tambri Housen: [tambri.housen@anu.edu.au](mailto:tambri.housen@anu.edu.au), Building 62, National Centre for Epidemiology & Population Health, Research School of Population Health, The Australian National University, Acton, Australia
- Professor Martyn D Kirk: [martyn.kirk@anu.edu.au](mailto:martyn.kirk@anu.edu.au), Building 62, National Centre for Epidemiology & Population Health, Research School of Population Health, The Australian National University, Acton, Australia
- Professor David N Durrheim: [David.Durrheim@newcastle.edu.au](mailto:David.Durrheim@newcastle.edu.au), University of Newcastle, Newcastle, New South Wales, Australia
- Dr Babatunde Olowokure: [olowokureb@who.int](mailto:olowokureb@who.int) World Health Organization, Geneva, Switzerland

**Keywords (3-10):** Emergency response, epidemiology, public health workforce, health security, workforce strengthening, community engagement, study protocol

**Ethics approval:** All components of this study have been approved by the Australian National University Human Research Ethics Committee: Ethics IDs 2018-521, 2018-641, 2019-068.

**Acknowledgements:** Thank you to the organisations and individuals who participated in the stakeholder consultation and initial open interviews. The findings from these discussions helped identify the research needs and framed the research questions.

**Abstract word count:** 289

**Manuscript Word count:** 3962

## List of abbreviations:

IHR - International Health Regulations

EPIET - European Programme Intervention Epidemiology Training

FETP - Field Epidemiology Training

1  
2  
3 FIFO - fly-in-fly-out

4 GOARN - Global outbreak alert and response network

5 IHR – International Health Regulations

6 MAE - Master of Applied Epidemiology

7 MSF - Médecins Sans Frontières

8 PI - Principal Investigator

9 TEPHINET - Training Programs in Epidemiology and Public Health Interventions Network

10 US CDC - United States Centers for Disease Control and Prevention

11 WHO - World Health Organization

12  
13  
14  
15  
16  
17  
18  
19  
20  
21  
22  
23  
24  
25  
26  
27  
28  
29  
30  
31  
32  
33  
34  
35  
36  
37  
38  
39  
40  
41  
42  
43  
44  
45  
46  
47  
48  
49  
50  
51  
52  
53  
54  
55  
56  
57  
58  
59  
60

For peer review only

## Abstract

**Introduction:** Determinants and drivers for emergencies such as political instability, weak health systems, climate change, and forcibly displaced populations, are increasing the severity, complexity and frequency of public health emergencies. As emergencies become more complex, it is increasingly important that the required skillset of the emergency response workforce is clearly defined. To enable essential epidemiological activities to be implemented and managed during an emergency, a workforce is required with the right mix of skills, knowledge, experience, and local context awareness. This study aims to provide local and international responders with an opportunity to actively contribute to the development of new thinking around emergency response roles and required competencies. In this study, we will develop recommendations using a broad range of evidence to address identified lessons and challenges so that future major emergency responses are culturally and contextually appropriate, and less reliant on long-term international deployments.

**Method and analysis:** We will conduct a mixed methods study using an exploratory sequential study design. The integration of four data sources, including key informant interviews, a scoping literature review, survey, and semi-structured interviews will allow the research questions to be examined in a flexible, semi-structured way, from a range of perspectives. The study is unequally weighted, with a qualitative emphasis. We will analyse all activities as individual components, and then together in an integrated analysis. Thematic analysis will be conducted in NVivo11 and quantitative analysis will be conducted in Stata15.

**Ethics and dissemination:** All activities have been approved by the Science and Medical Delegated Ethics Review Committee at the Australian National University (protocol numbers 2018-521, 2018-641, 2019-068). Findings will be disseminated through international and local deployment partners, peer reviewed publication, presentation at international conferences and through social media such as Twitter and Facebook.



## ARTICLE SUMMARY

### Strengths and limitations of this study

1. The evidence in this area remains weak with few scientific studies; preliminary stakeholder consultation supported the need for more evidence to inform best practice.
2. This study will build evidence to guide deployment and collaboration of the local and international epidemiology workforce that will enhance the effectiveness of the epidemiology response during future emergencies.
3. The iterative approach will support the research to explore both convergent and divergent findings in greater depth.
4. We expect a diversity of respondents with a range of perspectives which will improve our ability to understand lived realities and experiences in a multidimensional way.
5. We anticipate the sample will be multinational, we acknowledge this as both a strength and limitation, translation will be offered where needed.

### Box 1: Terms used in this study

Epidemiological role: a person who participates in surveillance, response, and disease investigation and control activities during an emergency.

Epidemiology responder: a person working in an epidemiological role during an emergency response, they may or may not be a citizen of the country they are responding within.

Local responder: A responder who is a citizen of the country in which the response is occurring.

International responder: A responder who is not a citizen of the country in which the response is occurring.

## INTRODUCTION

Emergencies do not discriminate; they can happen at any time, in any country. Whether they are a natural hazard such as a flood or cyclone, an infectious disease outbreak, or domestic or regional instability, any serious disruption of community functioning may lead to a situation where the ability

1  
2  
3 of the affected community to manage using its own resources is exceeded.(1) The International  
4 Health Regulations (IHR) are a legal instrument that defines the rights and obligations of countries  
5 regarding infectious disease surveillance, alert, and response.(2) Countries signatory to the IHR,  
6 regularly evaluate their capacity as outlined in the IHR;(2) IHR evaluations have identified that few  
7 countries have met the minimum standard.(3,4) One core IHR capacity is related to workforce, the  
8 routine evaluations have identified that there is still much work to be done to achieve resilient  
9 health systems with a strong local workforce capable of responding to public health emergencies.(5)  
10  
11 Emergency response requires collaboration between many professions; epidemiologists are  
12 generally recognised as a core contributor. The primary role of the epidemiology emergency  
13 response workforce is to ensure the health and safety of the affected population through the  
14 minimization of mortality and morbidity.(6,7) This is achieved through a number of activities  
15 including establishing and/or monitoring early warning surveillance systems, using multiple sources  
16 of data and information to conduct risk assessments, rapidly, efficiently and effectively initiating  
17 investigation and control activities, and providing information for decision-making.(6–8)  
18  
19 This study will seek to define the epidemiological roles and required competencies of both the  
20 international and local epidemiology workforce during emergency response.  
21  
22  
23  
24  
25  
26  
27  
28  
29  
30  
31  
32  
33  
34  
35  
36  
37  
38  
39  
40

### 41 **Study rationale**

42  
43 Internationally, the determinants and drivers for emergencies such as political instability,(8) weak  
44 health systems, (5,9) climate change, (10,11) and forcibly displaced populations,(12) are increasing in  
45 severity and frequency.(4) Emergencies are becoming protracted and more complex;(4,8,13–16) this  
46 has implications for emergency response management and the required emergency response  
47 workforce. To enable essential epidemiological activities to be implemented and effectively  
48 managed during an emergency, a workforce is required with the right mix of skills, knowledge,  
49 experience, and local context awareness.  
50  
51  
52  
53  
54  
55  
56  
57  
58  
59  
60

1  
2  
3 When emergencies exceed local workforce capacity, support may be required in the form of the  
4 international emergency response workforce.(3) Gostin and Friedman in their 2015 review of the  
5 West African Ebola response identified that there was a need to refine who is deployed and to  
6 certify the competencies of the public health emergency response workforce.(9) Although the  
7 international workforce are used to fill technical needs, many factors affect their usefulness.

8 Responders without the necessary leadership, technical, cultural, or communication skills can limit  
9 the effectiveness of the response, drain limited resources, and potentially cause harm.(17,18) The  
10 short-term fly-in fly-out (FIFO) nature of international emergency responders means high and rapid  
11 staff turnover, which can lead to issues with continuity of response,(19) institutional knowledge  
12 loss,(19) and inconsistent support for local responders.

13  
14 Examining the international epidemiology workforce role is only one part of the picture. Local  
15 epidemiology workforce knowledge and context understanding is essential to ensuring the  
16 effectiveness of emergency response.(20,21) Previous healthcare professional research has  
17 identified the lack of engagement and training of local responders during emergency response as  
18 problematic.(17) Supporting the local workforce throughout an emergency can contribute towards  
19 local workforce upskilling, continuity of essential work, and reduce the impact of international  
20 staffing rotations.(19) Vignettes found in the literature support the value of capacity building of the  
21 local workforce during an emergency,(20,22–26) however the evidence for best practice remains  
22 weak due to few scientific studies particularly focused on this area.

23  
24 Checchi et al highlighted the absence of formal professional certification for professionals during  
25 emergencies.(27) Work has been started for certification of medical personnel during emergencies,  
26 (27,28) however, this has not yet been initiated for other public health professions. Emergency  
27 response organisations, such as the World Health Organization (WHO) and Médecins Sans Frontières  
28 (MSF), aspire to similar values of technical excellence and professionalism.(29–31) This study will  
29 build evidence on what technical excellence and professionalism looks like for the epidemiology  
30

1  
2  
3 Oworkforce during emergencies. Clarity on roles and competencies required during international  
4  
5 emergency response will support adequate preparation prior to deployment of international  
6  
7 responders.(17,18) New thinking is needed to identify how local and international responder (Box 1)  
8  
9 collaboration and upskilling can strengthen the effectiveness of an emergency response.  
10  
11 Development of this knowledge will increase the cultural and contextually appropriate nature of  
12  
13 response as well as facilitate less long-term reliance on the international workforce.(20)  
14  
15  
16

### 17 **Study questions**

18  
19  
20 We conducted a stakeholder consultation in 2018 with five international emergency response and  
21  
22 global health agencies. This consultation aimed to identify needs in emergency response research  
23  
24 and needs according to these emergency response agencies. The findings of this consultation,  
25  
26 combined with the reviewed literature, framed the development of our research questions.  
27  
28  
29

30 We aim to answer three questions:

- 31  
32
- 33 • What is the role of the epidemiology workforce during emergencies in low or limited resource  
34 settings?  
35
  - 36 • What are the capacity needs of the local and international epidemiology workforce during an  
37 emergency response in low resource settings?  
38
  - 39 • How can the emergency epidemiology workforce model be strengthened to transfer skills and  
40 knowledge among local and international responders?  
41  
42  
43  
44  
45

### 46 **Goal and objectives**

47  
48  
49 This study will seek to define the epidemiological roles and required competencies of both the  
50  
51 international and local epidemiology workforce during emergency response. This study is the first  
52  
53 step in ensuring a more effective epidemiological response during future emergencies. Specifically,  
54  
55 the objectives of this study are to:  
56  
57  
58  
59  
60

- 1
- 2
- 3 • Describe existing models of deployment for epidemiologists in international emergency
- 4 response, focusing on strengths and challenges.
- 5
- 6
- 7
- 8 • Identify the capacity needs of the epidemiology workforce in surveillance and response during
- 9 an emergency.
- 10
- 11
- 12 • Provide evidence towards:
- 13
  - 14 ○ Creating a guide for the transfer of epidemiological knowledge and skills during
  - 15 emergency response.
  - 16
  - 17 ○ Developing a framework for local and international epidemiology roles during
  - 18 emergencies.
  - 19
  - 20
  - 21
  - 22
  - 23
  - 24
  - 25

## 26 **METHOD and ANALYSIS**

27  
28 This mixed methods study uses an exploratory sequential study design, integrating qualitative and  
29 quantitative data sources from a scoping literature review, key informant interviews, an emergency  
30 responder survey, and semi-structured interviews.  
31  
32

### 33 **Patient and public involvement**

34  
35 To develop the research questions we conducted a stakeholder consultation with international  
36 emergency response and global health agencies. Stakeholders will continue to support the study and  
37 results will be disseminated with and through them. No patients will be involved in this study.  
38  
39

### 40 **Study population**

41  
42 The target population for key informant interviews are representatives from organisations that have  
43 a major emergency response deployment component, and the epidemiology workforce working  
44 through those organisations (both local and international). Organisations include WHO, the Global  
45 Outbreak Alert and Response Network (GOARN), MSF, and United States Centers for Disease Control  
46 and Prevention (US CDC).  
47  
48  
49  
50  
51  
52  
53  
54  
55  
56  
57  
58  
59  
60

1  
2  
3 The emergency responder survey and semi-structured interviews study population are the  
4 epidemiology emergency response workforce. We will specifically target Field Epidemiology Training  
5 Programme (FETP) officers and graduates, accessed through international epidemiology training  
6 networks such as TEPHINET (Training Programs in Epidemiology and Public Health Interventions  
7 Network).

### 14 15 **Study design**

16  
17 We will conduct an exploratory sequential mixed methods study to build a comprehensive picture of  
18 the epidemiology workforce roles and required skills during emergency response. Mixed methods is  
19 the collection and integration of both quantitative and qualitative approaches to develop a more  
20 complete understanding of the research area.(32,33) This study will take advantage of the strengths  
21 and utility of each method based on the question being answered and the data to be collected.(33)  
22 The study is unequally weighted, with a qualitative emphasis.(32) Quantitative and qualitative  
23 components will be conducted sequentially.(32)

24  
25 Consistent with the mixed methods approach, the integration and analysis of data from each activity  
26 will further inform the development of subsequent activities.(34) An iterative approach will ensure  
27 the design and direction of subsequent activities is appropriate according to the knowledge gained.

28  
29 We will take a pragmatic interpretivist approach.(33,35,36) Understanding the information obtained  
30 will be a process of interpretation viewed through the researchers cultural and experience lens, and  
31 then explored with local and international stakeholders to further understand the meaning and  
32 potential application of the findings.(36) We acknowledge that the findings will be time and context  
33 bound and framed by the life experiences of the participants as well as that of the researchers.(36)

### 34 35 **Study components**

36  
37 The study model in Figure 1 outlines the main study components and how they inform each other.  
38  
39  
40  
41  
42  
43  
44  
45  
46  
47  
48  
49  
50  
51  
52  
53  
54  
55  
56  
57  
58  
59  
60

1  
2  
3 An overview of the current epidemiological emergency response workforce will be conducted  
4  
5 through a scoping literature review. The integration of themes identified in the literature review and  
6  
7 the initial stakeholder consultation will support development of a semi-structured interview guide  
8  
9 for key informant interviews.  
10

11  
12 Findings from key informant interviews will inform the development of items for an online survey  
13  
14 that will be disseminated via social media as well as distributed to officers and graduates of field  
15  
16 epidemiology training programs, globally. Survey participants will be asked to participate in a semi-  
17  
18 structured interview where convergent and divergent perspectives emerging from the survey will be  
19  
20 further explored.  
21  
22

23  
24 These activities will then inform the collection of evidence from epidemiology responders (Box 1) on  
25  
26 the knowledge and skills required as first responders to a public health emergency. The study of  
27  
28 epidemiology responders will consist of two activities; an online self-administered survey, and semi-  
29  
30 structured interviews. The semi-structured interviews will provide an opportunity for further  
31  
32 exploration of topics covered in the survey and examine the lived experience of the epidemiology  
33  
34 workforce during an emergency.  
35  
36

37  
38 Findings from the literature, key informant interviews, epidemiology responder survey, and semi-  
39  
40 structured interviews will be integrated and shared back with stakeholders to support  
41  
42 interpretation. These findings will form the basis for two key outputs; the emergency response  
43  
44 epidemiology workforce framework and emergency response epidemiology workforce training  
45  
46 guides. These tools will be developed in collaboration with stakeholders and then field tested.  
47  
48  
49

### 50 **Sampling**

51  
52 Early consultations with emergency response organisations identified the absence of accurate  
53  
54 emergency response workforce databases. This means that it will not be possible to conduct  
55  
56 representative sampling. Therefore, purposive sampling will be used to identify participants for the  
57  
58  
59  
60

1  
2  
3 various components in this study as the required participants will be contributing specific roles  
4  
5 during emergencies.(37,38) Participants will not be directly compensated for participation.  
6  
7

#### 8 *Key informant interviews*

9

10  
11 Key informant interviews will be people from organisations who have an epidemiology workforce  
12  
13 active during public health emergencies. These organisations include WHO, MSF, GOARN, USCDC.  
14  
15 Organisations will be asked to identify a short list of interviewees who fulfil the following criteria:  
16  
17 epidemiology emergency response experience, and/or supervised epidemiologists during emergency  
18  
19 response, and/or supported the deployment of epidemiologists, can communicate in English, and  
20  
21 available for interview. These interviewees will then be asked to identify other people to interview  
22  
23 (snowballing). To minimise clustering of networks, we will only select two candidates for interview  
24  
25 per interviewee from the names listed during snowballing. We aim to interview at least 10 people  
26  
27 and ensure there is a range of perspectives from different organisations by using minimum  
28  
29 organisational quotas based on organizational emergency epidemiology response size; WHO (n=4),  
30  
31 GOARN (n=2), MSF (n=2), US CDC (n=2).  
32  
33  
34  
35

#### 36 *Epidemiology Responder Survey*

37

38  
39 Access to organizational lists of emergency responders was not approved by participating  
40  
41 organizations, therefore we were unable to construct a sampling frame. For this reason purposive  
42  
43 sampling and snowballing was selected to identify participants for the epidemiology responder  
44  
45 survey. Epidemiology responders will be invited to participate in the survey via field epidemiology  
46  
47 networks including TEPHINET, the Australian Master of Applied Epidemiology (MAE) Alumni,  
48  
49 European Programme for Intervention Epidemiology Training (EPIET) Alumni, and the United States  
50  
51 Epidemic Intelligence Service (EIS) Alumni. A social media campaign will be run to recruit  
52  
53 epidemiology emergency responders who are outside of these networks (Twitter, LinkedIn, and  
54  
55 Facebook) so as to disseminate the survey as widely as possible across all regions of the world  
56  
57  
58  
59  
60



1  
2  
3 Sample size estimates will be calculated based on the TEPHINET alumni database (TEPHIconnect).  
4  
5 TEPHIconnect have a population of 1700 active members; with a confidence level of 95% and  
6  
7 confidence interval of 7, we hope to recruit at least 176 survey respondents. This sample size is  
8  
9 supported by previous unpublished survey response rates through TEPHIconnect (9.8%), MAE  
10  
11 Alumni (49%), and EPIET (52%).  
12  
13  
14

#### 15 *Semi-structured interviews*

16  
17  
18 In the case of many survey participants self-selecting for interview, maximum variation sampling will  
19  
20 be used. Selection of participants based on region, organisation, and/or event responded to, will  
21  
22 ensure we have a cross-section of perspectives.(39) Interviews will continue until saturation is  
23  
24 reached,(40,41) no more interviewees are identified, or the project period ends. We anticipate to  
25  
26 interview a minimum of 20 people.(41–43)  
27  
28  
29

#### 30 **Data collection**

##### 31 *Scoping literature review*

32  
33 Multiple bibliographic databases will be used to identify literature. Public health databases searched  
34  
35 will be Scopus, PubMed, Web of Science, Embase, CINHALL, International Bibliography of the Social  
36  
37 Sciences (IBSS) and the World Health Organisation library database (WHO LIS).  
38  
39  
40

41  
42 We will search 10 years of articles published in English; January 2009 to December 2018. A limited  
43  
44 snowballing exercise will then be done, reference lists of all included studies will be searched. The  
45  
46 same search strategy will be used in all databases. Date, time, and result number of each database  
47  
48 search will be tracked in a Microsoft Excel spreadsheet.  
49  
50  
51

52 Search terms will include, health personnel, health worker, epidemiologist, humanitarian, Public  
53  
54 Health Professional, healthcare professional, health workforce, emergency, emergencies, disaster,  
55  
56 relief work, disease outbreaks, hazard, relief operations, refugee, role, job, position, task.  
57  
58  
59

##### 60 *Key Informant Interviews*

1  
2  
3 Using an interview guide, the key informant interviews will be semi-structured and carried out by  
4 the same interviewer. Interviews will be conducted via telephone or internet communications.  
5  
6 Questions aim to collect practical details on epidemiology deployment, common challenges  
7  
8 experienced, as well as the interviewee's opinion on roles and required skills for field work,  
9  
10 performance management in the field, and workforce upskilling during emergency response.  
11  
12 Questions will be informed by issues identified in the literature and stakeholder consultation. During  
13  
14 the interview period, the questions will be reviewed in an iterative style to ensure flow of questions,  
15  
16 to obtain clear answers.(44) Interviews will be recorded (with consent) and transcribed.  
17  
18  
19

#### 20 21 22 *Epidemiology responder survey*

23  
24 The survey of epidemiology responders will be self-administered online via REDCap. The survey will  
25  
26 be guided by the themes raised in the literature and during the key informant interviews. Questions  
27  
28 will be reviewed by key informant interviewees, and field tested with epidemiologists who have  
29  
30 emergency response experience. Open and closed ended questions will be used,(45) and will cover  
31  
32 topics such as the number of previous emergency response deployments, technical support in the  
33  
34 field, type of response, response context, cultural competency, role expectations compared to  
35  
36 reality, and previous training and experience. Participants will be requested to complete the survey  
37  
38 once only and it will be available in French and English.  
39  
40  
41

#### 42 43 *Epidemiology responder semi-structured interviews*

44  
45 An interview guide will be used for each semi-structured interview. The same interviewer will  
46  
47 conduct all interviews. The semi-structured format will give interviewees scope to discuss what is  
48  
49 important to them and the events they responded to. Interviews will be conducted in English,  
50  
51 interviewees can request translation support if needed. The interview will delve deeper into the  
52  
53 interviewee's experience during the emergency response. Interview questions will be informed by  
54  
55 common themes identified in the survey and key informant interviews. Divergent survey findings will  
56  
57 be further explored during the interviews. It is expected that interview questions may cover topics  
58  
59  
60

1  
2  
3 such as working with international and local epidemiologists, what their role was and how this  
4  
5 connected with other components of the response, whether they participated in or conducted  
6  
7 activities to upskill colleagues, and the perceived impact this had. They will be asked to discuss the  
8  
9 challenges faced during the response and what they did to address them.  
10  
11

### 12 **Data analysis**

13  
14  
15 Sequential and concurrent analysis will be conducted;(32) data from each activity will be used to  
16  
17 inform the next activity. We will analyse all activities as individual components, and then together in  
18  
19 a mixed analysis.(34)  
20  
21

22  
23 The literature review will be analysed thematically. Common themes and ideas identified will inform  
24  
25 the development of key informant interviews. Key informant interviews will be analysed to support  
26  
27 development of themes for the epidemiology responder survey, and then all previous findings will  
28  
29 inform the question development for the semi-structured interviews.  
30  
31

32  
33 Key informant interview and semi-structured interview data will be coded by two people. A code  
34  
35 book will be used with clear definitions for each code. Discrepancies will be discussed between  
36  
37 coders and clarified in the code book if necessary.(46) The coding will then analysed through  
38  
39 thematic analysis, using NVivo 11. Thematic analysis will be an iterative process, with concepts and  
40  
41 themes developed and combined as the findings are analysed and relationships are  
42  
43 identified.(40,47,48) We define a theme as a pattern identified within the data.(47,49) These themes  
44  
45 can be implicit or explicit. Analysis will be data-driven, inductive coding will be conducted initially to  
46  
47 identify relationships within the data without using a pre-existing frame.(40,47) A thematic  
48  
49 codebook outlining inclusion and exclusion criteria will be developed to ensure validity, consistency,  
50  
51 and repeatability of coding. Interviews will be coded in two ways. Firstly, interviews will be coded  
52  
53 based on the explicitly stated words and ideas (semantic), then interviews will be coded for  
54  
55 underlying ideas and assumptions (latent).(47) All codes will be further reviewed, cleaned, analysed,  
56  
57 summarised, and interpreted for meaning.(47)  
58  
59  
60

1  
2  
3 Survey data will be analysed descriptively in STATA 15. Data will be further analysed to determine  
4  
5 associations within and between respondents. Data will be examined for trends within and between  
6  
7 international and local responders, comparison of trends between emergency response event types,  
8  
9 and skill level and experience of responders.  
10

11  
12 Triangulation and a mixed methods matrix will be used to combine qualitative and quantitative  
13  
14 themes.<sup>(50)</sup> This will be conducted iteratively throughout the research, as outlined in the study  
15  
16 model (Figure 1). **Data interpretation**  
17

18  
19 The data from all of these activities will be integrated and patterns, themes, and relationships  
20  
21 formed and examined. The iterative approach will ensure that converging and diverging themes will  
22  
23 be further explored in proceeding activities and support answering the research questions or  
24  
25 development of further studies. We expect that mixing of the data will complement and extend the  
26  
27 knowledge obtained.<sup>(51)</sup> Triangulation of this data will contribute evidence towards development of  
28  
29 the workforce framework and identify training needs of local and international responders.<sup>(51)</sup>  
30  
31

32  
33 Preliminary findings will be shared back with stakeholders, including key informant interviewees and  
34  
35 study participants, to provide an opportunity to comment and provide further feedback. Workshops  
36  
37 will be conducted with stakeholders to ensure the results are interpreted according to local settings.  
38  
39 The theory of change model will be used to support the process of taking the themes identified in  
40  
41 the research through to stakeholder consultation and then framework development and  
42  
43 implementation.<sup>(52,53)</sup>  
44  
45  
46  
47  
48  
49

## 50 **DISCUSSION**

51  
52 Discourse around development and aid, including emergency response, identify that good intentions  
53  
54 can cause unintentional harm.<sup>(54)</sup> Heymann et al identified the 'parachuting' in of international  
55  
56 responders as a key ethical issue occurring during public health emergencies,<sup>(55)</sup> as is the lack of  
57  
58 engaging and upskilling of local responders. In this study, response approaches will be studied to  
59  
60

1  
2  
3 increase meaningful participation and engagement of local responders to ensure a contextually  
4 appropriate response.(20)  
5

6  
7 Maintaining a 'country focus' is one of WHO's guiding principles.(56) This study aims to ensure that  
8 local responders are an active part of defining the roles and required competencies of the  
9  
10 epidemiology emergency response workforce. Both the local and international workforce included in  
11  
12 the study will contribute towards developing new thinking about emergency response and ensuring  
13  
14 the strengths of all responders are taken advantage of, as well as developing recommendations to  
15  
16 ensure a legacy of an upskilled local workforce post-response. Capacity building, partnerships, active  
17  
18 local participation, mentoring and coaching, and collaboration during emergency response are  
19  
20 themes that will be explored.  
21  
22

23  
24 The mixed methods iterative approach we will use in this study will support us to examine this topic  
25  
26 in a flexible, semi-structured way, from a range of perspectives.(57) Emergency response is a  
27  
28 complex area, in which a multitude of players are conducting a huge amount of work concurrently,  
29  
30 under great pressure. Considering this complexity through a variety of lenses will improve our ability  
31  
32 to understand the lived realities and experiences of epidemiology responders, in a multidimensional  
33  
34 way.(57,58) The combination of survey data and semi-structured interviews will support the  
35  
36 development of recommendations that use a broad range of evidence to address the current  
37  
38 challenges.  
39  
40  
41  
42

#### 43 **Ethics**

44  
45 All activities have been approved by the Science and Medical Delegated Ethics Review Committee at  
46  
47 the Australian National University, protocol numbers 2018-521, 2018-641, 2019-068.  
48  
49

#### 50 **Consent**

51  
52 Participation in this study will be voluntary; individual written (or online) consent will be sought from  
53  
54 all participants. Each participant will receive a study information sheet that outlines the project and  
55  
56 expectations in plain language.  
57  
58  
59  
60

### **Expected output**

A key output of this research will be the development of evidence-based epidemiological emergency workforce recommendations to increase the effectiveness of epidemiologists during emergencies.

The research will contribute towards creating an epidemiology emergency workforce framework, which will underpin the role of the epidemiology workforce in a range of emergency types, as well as outline the required responder competencies.

The identification of unmet needs in the current epidemiology training, will support training programmes to address the identified needs and improve the application of skills during a response.

We will also identify, develop, and collate a range of evidence-based resources that can support appropriate upskilling during a response from entry level epidemiology onwards, for both local and international responders.

### **Dissemination**

Through engaging both international and local emergency response partners throughout this study, we hope to ensure this research remains useful and relevant to potential end users.

All participants will be provided with a weblink to keep updated with study progress and outputs through the research. Results will also be disseminated through social media such as Twitter, LinkedIn, and Facebook. It is expected that manuscripts for publication as well as conference presentations will be developed to disseminate the results of this study. Manuscripts will be published in open access journals and findings will be further disseminated with and through participating emergency response organisations.

### **Limitations**

As with all studies, this study has inherent limitations that we have attempted to mitigate. During this research we aim to minimise the impact that bias may have on the results we obtain. Interviews

1  
2  
3 conducted in this research aim to understand processes and experiences, not to analyse how  
4 distributed these experiences are.(40) As a limited number of people have the knowledge and  
5 experience required to participate in the key informant interviews, purposive sampling may  
6 introduce bias. Organisational shortlisting of possible candidates could lead to selection of  
7 candidates who may have organisationally approved views on emergency response. Snowballing can  
8 also introduce bias as these interviewees are from the same network and therefore may hold similar  
9 opinions.(59) Pre-set selection criteria of possible participants and our multi-step sampling method  
10 aims to minimise these biases. As noted above, we aim to minimise clustering of common networks  
11 during snowballing through selection and invitation of a maximum of two candidates per  
12 interviewee.

13  
14  
15  
16  
17  
18  
19  
20  
21  
22  
23  
24  
25  
26 Another possible limitation to this study is obtaining an accurate denominator for the target  
27 populations. The numbers and scale of emergencies change from year-to-year, and the workforce  
28 shifts according to need, as well as other factors such as organisational funding. We will attempt to  
29 mitigate this by working with local and international participating agencies and networks to  
30 ascertain epidemiology workforce estimations for the study period.

31  
32  
33  
34  
35  
36  
37  
38 As the timing of the survey and interview is not during or immediately after an emergency response,  
39 recall bias may affect the information obtained. This timing may have added advantages as people  
40 have time to be reflective of what went well and what could be improved.(60,61)

41  
42  
43  
44  
45  
46  
47  
48  
49  
50  
51  
52  
53  
54  
55  
56  
57  
58  
59  
60  
There is a risk of selection bias during the epidemiology emergency responder survey as it is a self-  
administered online survey. To attempt to lessen the impact of this bias, we will use multiple  
pathways to recruit participants and we will collaborate closely with emergency response partners.

As the survey will be available in multiple languages, this will increase representation from a variety  
of people as well as contexts.

There will also be varying timeframes between emergency response and survey completion between  
epidemiology responder survey participants. Participants may therefore have different levels of

1  
2  
3 recall, and people with extremely negative or positive response experiences may remember  
4  
5 differently. Questions on deployment will be broad to lessen the impact that this may have, and  
6  
7 divergent findings will be further explored in the semi-structured interviews.  
8  
9

10 Additionally, the Principal Investigator (PI) for this study has worked in both acute and protracted  
11  
12 emergencies as an epidemiologist. The views of the PI on this topic may introduce bias and influence  
13  
14 the questions asked and the information obtained. The PI acknowledges this possible bias and will  
15  
16 seek perspectives and interpretations on questions and analysis, with local and international  
17  
18 stakeholders.  
19  
20

21  
22 This study will build evidence to guide epidemiology emergency response and collaboration of the  
23  
24 local and international epidemiology workforce that will enhance the effectiveness of the  
25  
26 epidemiology response during future emergencies. Development of clearly articulated  
27  
28 epidemiological roles during emergency response will enable organisations to better use the skills of  
29  
30 the epidemiology workforce. The provision of recommendations to technically support local  
31  
32 responders should decrease reliance on the international responder workforce and increase the  
33  
34 cultural and contextual appropriateness of the response.  
35  
36  
37  
38  
39  
40  
41

42 **Author contributions:** AP wrote the manuscript and is leading the study; TH, BO, DD, MK supported  
43  
44 study design development and revised the manuscript critically. All authors read and approved the  
45  
46 final manuscript.  
47  
48

49 **Competing interests:** The authors declare that they have no competing interests.  
50  
51

52 **Funding:** This research received no specific grant from any funding agency in the public, commercial  
53  
54 or not-for-profit sectors. AP receives Commonwealth and ANU science merit scholarships, along with  
55  
56 funding from the Australian National Health and Medical Research Council (NHMRC) Integrated  
57  
58 Systems for Epidemic Response (APP1107393). MDK is supported by an NHMRC fellowship  
59  
60



(APP1145997) and receives funding from the NHMRC for Integrated Systems for Epidemic Response.

The funders did not have any role in the study design, data collection and analysis, decision to publish or preparation of the manuscript.

**Data sharing statement:** We are sharing this protocol with BMJ open readers to be open with our planned methods and outcomes. We will report future results of this study as de-identified aggregate data. Data analysis plans and data collection tools can be made available.

## REFERENCES

1. WHO | Definitions: emergencies [Internet]. WHO. [cited 2018 May 31]. Available from: <http://www.who.int/hac/about/definitions/en/>
2. WHO | International Health Regulations (2005) [Internet]. WHO. [cited 2018 Apr 16]. Available from: <http://www.who.int/ihr/publications/9789241580496/en/>
3. Gates B. The Next Epidemic — Lessons from Ebola. *N Engl J Med*. 2015 Apr 9;372:1381–4.
4. Global Preparedness Monitoring Board. A world at risk: annual report on global preparedness for health emergencies [Internet]. Geneva: World Health Organization; 2019 [cited 2019 Sep 23]. Available from: [https://apps.who.int/gpmb/assets/annual\\_report/GPMB\\_annualreport\\_2019.pdf](https://apps.who.int/gpmb/assets/annual_report/GPMB_annualreport_2019.pdf)
5. Kruk ME, Myers M, Varpilah ST, et al. What is a resilient health system? Lessons from Ebola. *The Lancet*. 2015 May;385(9980):1910–2.
6. Waring SC, Brown BJ. The Threat of Communicable Diseases Following Natural Disasters: A Public Health Response. *Disaster Manag Response*. 2005 Apr;3(2):41–7.
7. Connolly MA, Gayer M, Ryan MJ, et al. Communicable diseases in complex emergencies: impact and challenges. *The Lancet*. 2004 Nov 27;364(9449):1974–83.
8. Brennan RJ, Nandy R. Complex humanitarian emergencies: A major global health challenge. *Emerg Med*. 2001 Jun 1;13(2):147–56.
9. Gostin LO, Friedman EA. A retrospective and prospective analysis of the west African Ebola virus disease epidemic: robust national health systems at the foundation and an empowered WHO at the apex. *The Lancet*. 2015 May;385(9980):1902–9.
10. Frumkin H, Hess J, Lubet G, et al. Climate Change: The Public Health Response. *Am J Public Health*. 2008 Mar;98(3):435–45.

11. UN ESCAP. The Disaster Riskscape Across Asia-Pacific. Pathways for resilience, inclusion and empowerment [Internet]. United Nations publication; 2019 [cited 2019 Sep 23]. Available from: <https://www.unescap.org/publications/asia-pacific-disaster-report-2019>.
12. UNHCR. Global Trends: Forced Displacement in 2018 [Internet]. [cited 2019 Aug 22]. Available from: <https://www.unhcr.org/5d08d7ee7.pdf>
13. Blanchet K, Ramesh A, Frison S, et al. Evidence on public health interventions in humanitarian crises. *The Lancet*. 2017 Nov 18;390(10109):2287–96.
14. Chan JL, Burkle FM. A Framework and Methodology for Navigating Disaster and Global Health in Crisis Literature. *PLoS Curr* [Internet]. 2013 Apr 4 [cited 2018 May 31];5. Available from: <https://www.ncbi.nlm.nih.gov/pmc/articles/PMC3625621/>
15. Spiegel P, Chanis R, Trujillo A. Innovative health financing for refugees. *BMC Med*. 2018 Jun 15;16:90.
16. WHO | WHO's Six-Year Strategic Plan to Minimize the Health Impact of Emergencies and Disasters [Internet]. WHO. [cited 2018 May 18]. Available from: <http://www.who.int/hac/donorinfo/six-year-humanitarian-plan/en/>
17. Hunt MR. Moral experience of Canadian healthcare professionals in humanitarian work. *Prehospital Disaster Med*. 2009 Dec;24(6):518–24.
18. Chiu C-Y, Lonner WJ, Matsumoto D, et al. Cross-Cultural Competence. *J Cross-Cult Psychol*. 2013;44(6):843–8.
19. Hunt MR. Establishing moral bearings: ethics and expatriate health care professionals in humanitarian work. *Disasters*. 35(3):606–22.
20. Yozwiak NL, Happi CT, Grant DS, et al. Roots, Not Parachutes: Research Collaborations Combat Outbreaks. *Cell*. 2016 Jun 30;166(1):5–8.
21. Currie J, Grenfell B, Farrar J. Beyond Ebola. *Science*. 2016 Feb 19;351(6275):815–6.
22. Ehiri JE, Gunn JKL, Center KE, et al. Training and deployment of lay refugee/internally displaced persons to provide basic health services in camps: a systematic review. *Glob Health Action* [Internet]. 2014 Oct 1 [cited 2018 May 30];7. Available from: <https://www.ncbi.nlm.nih.gov/pmc/articles/PMC4185139/>
23. Bower H. NZARA Putting the capacity into capacity building in South Sudan. *The Lancet*. 2000 Aug 19;356(9230):661.
24. Buseh AG, Stevens PE, Bromberg M, et al. The Ebola epidemic in West Africa: Challenges, opportunities, and policy priority areas. *Nurs Outlook*. 2015 Jan;63(1):30–40.
25. UNHCR - Rohingya refugee volunteers trained to help others in distress [Internet]. [cited 2018 May 30]. Available from: <http://www.unhcr.org/news/latest/2018/5/5b066a544/rohingya-refugee-volunteers-trained-help-others-distress.html>
26. André AM, Lopez A, Perkins S, et al. Frontline Field Epidemiology Training Programs as a Strategy to Improve Disease Surveillance and Response. *Emerg Infect Dis*. 2017 Dec;23(Suppl 1):S166–73.

- 1
  - 2
  - 3
  - 4
  - 5
  - 6
  - 7
  - 8
  - 9
  - 10
  - 11
  - 12
  - 13
  - 14
  - 15
  - 16
  - 17
  - 18
  - 19
  - 20
  - 21
  - 22
  - 23
  - 24
  - 25
  - 26
  - 27
  - 28
  - 29
  - 30
  - 31
  - 32
  - 33
  - 34
  - 35
  - 36
  - 37
  - 38
  - 39
  - 40
  - 41
  - 42
  - 43
  - 44
  - 45
  - 46
  - 47
  - 48
  - 49
  - 50
  - 51
  - 52
  - 53
  - 54
  - 55
  - 56
  - 57
  - 58
  - 59
  - 60
27. Checchi F, Waldman RJ, Roberts LF, et al. World Health Organization and emergency health: if not now, when?: *BMJ*. 2016 Jan 28;i469.
28. Foreign Medical Team Working Group under the Global Health Cluster, Norton I, Schreeb J von, Aitken P, Herard P, Lajolo C. Classification and minimum standards for foreign medical teams in sudden onset disasters [Internet]. World Health Organization,; [cited 2018 Jul 23]. Available from: [http://www.who.int/hac/global\\_health\\_cluster/fmt\\_guidelines\\_september2013.pdf?ua=1](http://www.who.int/hac/global_health_cluster/fmt_guidelines_september2013.pdf?ua=1)
29. World Health Organization. WHO values charter [Internet]. [cited 2019 Jul 15]. Available from: [https://www.who.int/docs/default-source/documents/values-charter-en.pdf?Status=Temp&sfvrsn=4ed75cec\\_12](https://www.who.int/docs/default-source/documents/values-charter-en.pdf?Status=Temp&sfvrsn=4ed75cec_12)
30. United Nations. United National Competencies for the Future [Internet]. [cited 2019 Jul 15]. Available from: [https://careers.un.org/lbw/attachments/competencies\\_booklet\\_en.pdf](https://careers.un.org/lbw/attachments/competencies_booklet_en.pdf)
31. Médecins Sans Frontières (MSF) International. Who we are [Internet]. Médecins Sans Frontières (MSF) International. [cited 2019 Jul 15]. Available from: <https://www.msf.org/who-we-are>
32. Creswell JW, Plano Clark V. Designing and conducting mixed methods research. Sage Publications; 2007.
33. Johnson RB, Onwuegbuzie AJ. Mixed Methods Research: A Research Paradigm Whose Time Has Come. *Educ Res*. 2004;33(7):14–26.
34. Bazeley P. Integrative Analysis Strategies for Mixed Data Sources. *Am Behav Sci*. 2012 Jun;56(6):814–28.
35. Cameron R. Mixed Methods Research: The Five Ps Framework. *Electron J Bus Res Methods*. 2011;9(2):96–108.
36. Carol Grbich. Qualitative Data Analysis: An Introduction. Second Edition. The Flinders University of South Australia: SAGE Publishing;
37. Deborah K. Padget. Qualitative and Mixed Methods in Public Health. SAGE Publications; 2012.
38. Teddlie C, Yu F. Mixed Methods Sampling: A Typology With Examples. *J Mix Methods Res*. 2007 Jan;1(1):77–100.
39. Palinkas LA, Horwitz SM, Green CA, et al. Purposeful sampling for qualitative data collection and analysis in mixed method implementation research. *Adm Policy Ment Health*. 2015 Sep;42(5):533–44.
40. Liamputtong P. Qualitative Research Methods [Internet]. South Melbourne, Vic., Oxford University Press; 2009 [cited 2018 Jul 25]. Available from: <https://trove.nla.gov.au/work/7394612>
41. Bowen GA. Naturalistic inquiry and the saturation concept: a research note. *Qual Res*. 2008 Feb 1;8(1):137–52.
42. Creswell JW, Poth CN. Qualitative Inquiry and Research Design: Choosing Among Five Approaches. SAGE Publications; 2016. 489 p.

- 1
- 2
- 3
- 4 43. Morse JM. Determining Sample Size: Qual Health Res [Internet]. 2016 Jul 1 [cited 2020 May 1];
- 5 Available from: <https://journals.sagepub.com/doi/10.1177/104973200129118183>
- 6
- 7 44. Guest G, MacQueen KM, Namey E. Chapter 2 | Planning and Preparing the Analysis. In: Applied
- 8 Thematic Analysis [Internet]. SAGE Publications; 2012 [cited 2018 Oct 10]. Available from:
- 9 [https://us.sagepub.com/sites/default/files/upm-binaries/44135\\_2.pdf](https://us.sagepub.com/sites/default/files/upm-binaries/44135_2.pdf)
- 10
- 11 45. de Vaus D. Surveys in Social Research. 6th edition. Allen & Unwin - Australia; 2014.
- 12
- 13 46. Using multiple coders to enhance qualitative analysis: The case of interviews with consumers
- 14 of drug treatment: Addiction Research & Theory: Vol 13, No 4 [Internet]. [cited 2020 May 4].
- 15 Available from: <https://www.tandfonline.com/doi/abs/10.1080/16066350500102237>
- 16
- 17 47. Braun V, Clarke V. Using thematic analysis in psychology. Qual Res Psychol. 2006 Jan 1;3(2):77–
- 18 101.
- 19
- 20 48. Bazeley P. Analysing Qualitative Data: More Than ‘Identifying Themes.’ Malays J Qual Res.
- 21 2009;2(2):6–22.
- 22
- 23 49. Joffe H. Chapter 15: Thematic Analysis. In: Qualitative Research Methods in Mental Health and
- 24 Psychotherapy: A Guide for Students and Practitioners. Edied by David Harper and Andrew
- 25 Thompson. Chichester; 2012. p. 209–23.
- 26
- 27 50. O’Cathain A, Murphy E, Nicholl J. Three techniques for integrating data in mixed methods
- 28 studies. BMJ [Internet]. 2010 Sep 17 [cited 2020 May 1];341. Available from:
- 29 <https://www.bmj.com/content/341/bmj.c4587>
- 30
- 31 51. Bazeley P. Teaching Mixed Methods. Qual Res J. 2003;3 (special issue):117–26.
- 32
- 33 52. What is Theory of Change? [Internet]. Theory of Change Community. [cited 2020 May 1].
- 34 Available from: <https://www.theoryofchange.org/what-is-theory-of-change/>
- 35
- 36 53. Taplin D, Clark H. Theory of Change basics [Internet]. 2012 Mar [cited 2018 Jun 13]. Available
- 37 from: [http://www.theoryofchange.org/wp-content/uploads/toco\\_library/pdf/ToCBasics.pdf](http://www.theoryofchange.org/wp-content/uploads/toco_library/pdf/ToCBasics.pdf)
- 38
- 39 54. Hunt MR, Schwartz L, Sinding C, et al. The Ethics of Engaged Presence: A Framework for Health
- 40 Professionals in Humanitarian Assistance and Development Work. Dev World Bioeth. 2014 Apr
- 41 1;14(1):47–55.
- 42
- 43 55. Heymann DL, Liu J, Lillywhite L. Partnerships, Not Parachutists, for Zika Research. N Engl J Med.
- 44 2016 Apr 21;374(16):1504–5.
- 45
- 46 56. World Health Organization. Emergency Response Framework (ERF) 2nd edition [Internet].
- 47 Geneva; 2017 [cited 2018 May 18]. Available from: <http://www.who.int/hac/about/erf/en/>
- 48
- 49 57. Pat Bazeley. Integrating Analyses in Mixed Methods Research. SAGE Publications 2012; 2018.
- 50
- 51 58. Mason J. Mixing methods in a qualitatively driven way. Qual Res. 2006 Feb 1;6(1):9–25.
- 52
- 53 59. Onwuegbuzie AJ, Collins KMT. The Role of Sampling in Mixed Methods-Research: Enhancing
- 54 Inference Quality. KZfSS Köln Z Für Soziol Sozialpsychologie. 2017 Oct;69(S2):133–56.
- 55
- 56
- 57
- 58
- 59
- 60

- 1  
2  
3 60. Bernard AW, Gorgas D, Greenberger S, et al. The Use of Reflection in Emergency Medicine  
4 Education. Acad Emerg Med. 2012;19(8):978–82.  
5  
6 61. World Health Organization. Guidance for after action review (AAR) [Internet]. Geneva,  
7 Switzerland: World Health Organization; 2019 [cited 2019 Oct 8]. Report No.:  
8 WHO/WHE/CPI/2019.4. Available from:  
9 [https://apps.who.int/iris/bitstream/handle/10665/311537/WHO-WHE-CPI-2019.4-](https://apps.who.int/iris/bitstream/handle/10665/311537/WHO-WHE-CPI-2019.4-eng.pdf?sequence=1)  
10 [eng.pdf?sequence=1](https://apps.who.int/iris/bitstream/handle/10665/311537/WHO-WHE-CPI-2019.4-eng.pdf?sequence=1)  
11  
12  
13  
14  
15  
16  
17  
18  
19  
20  
21  
22  
23  
24  
25  
26  
27  
28  
29  
30  
31  
32  
33  
34  
35  
36  
37  
38  
39  
40  
41  
42  
43  
44  
45  
46  
47  
48  
49  
50  
51  
52  
53  
54  
55  
56  
57  
58  
59  
60

For peer review only

Figure 1: Study model for evidence building for emergency response epidemiology workforce

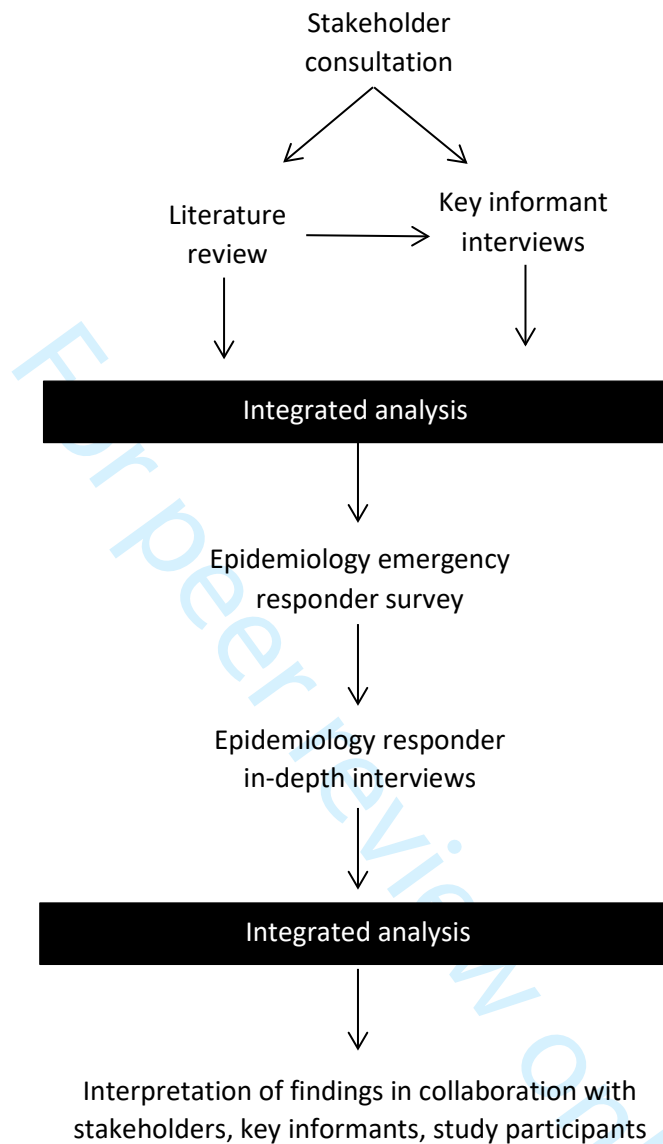

Supplement: bmjopen-2020-037326.draft_revisions.pdf [file bmjopen-2020-037326.draft_revisions.pdf]
